# Supplementary material
Source: ML conference proceedings conference paper supplement (https://openreview.net/forum?id=H2V43wIj5g9)

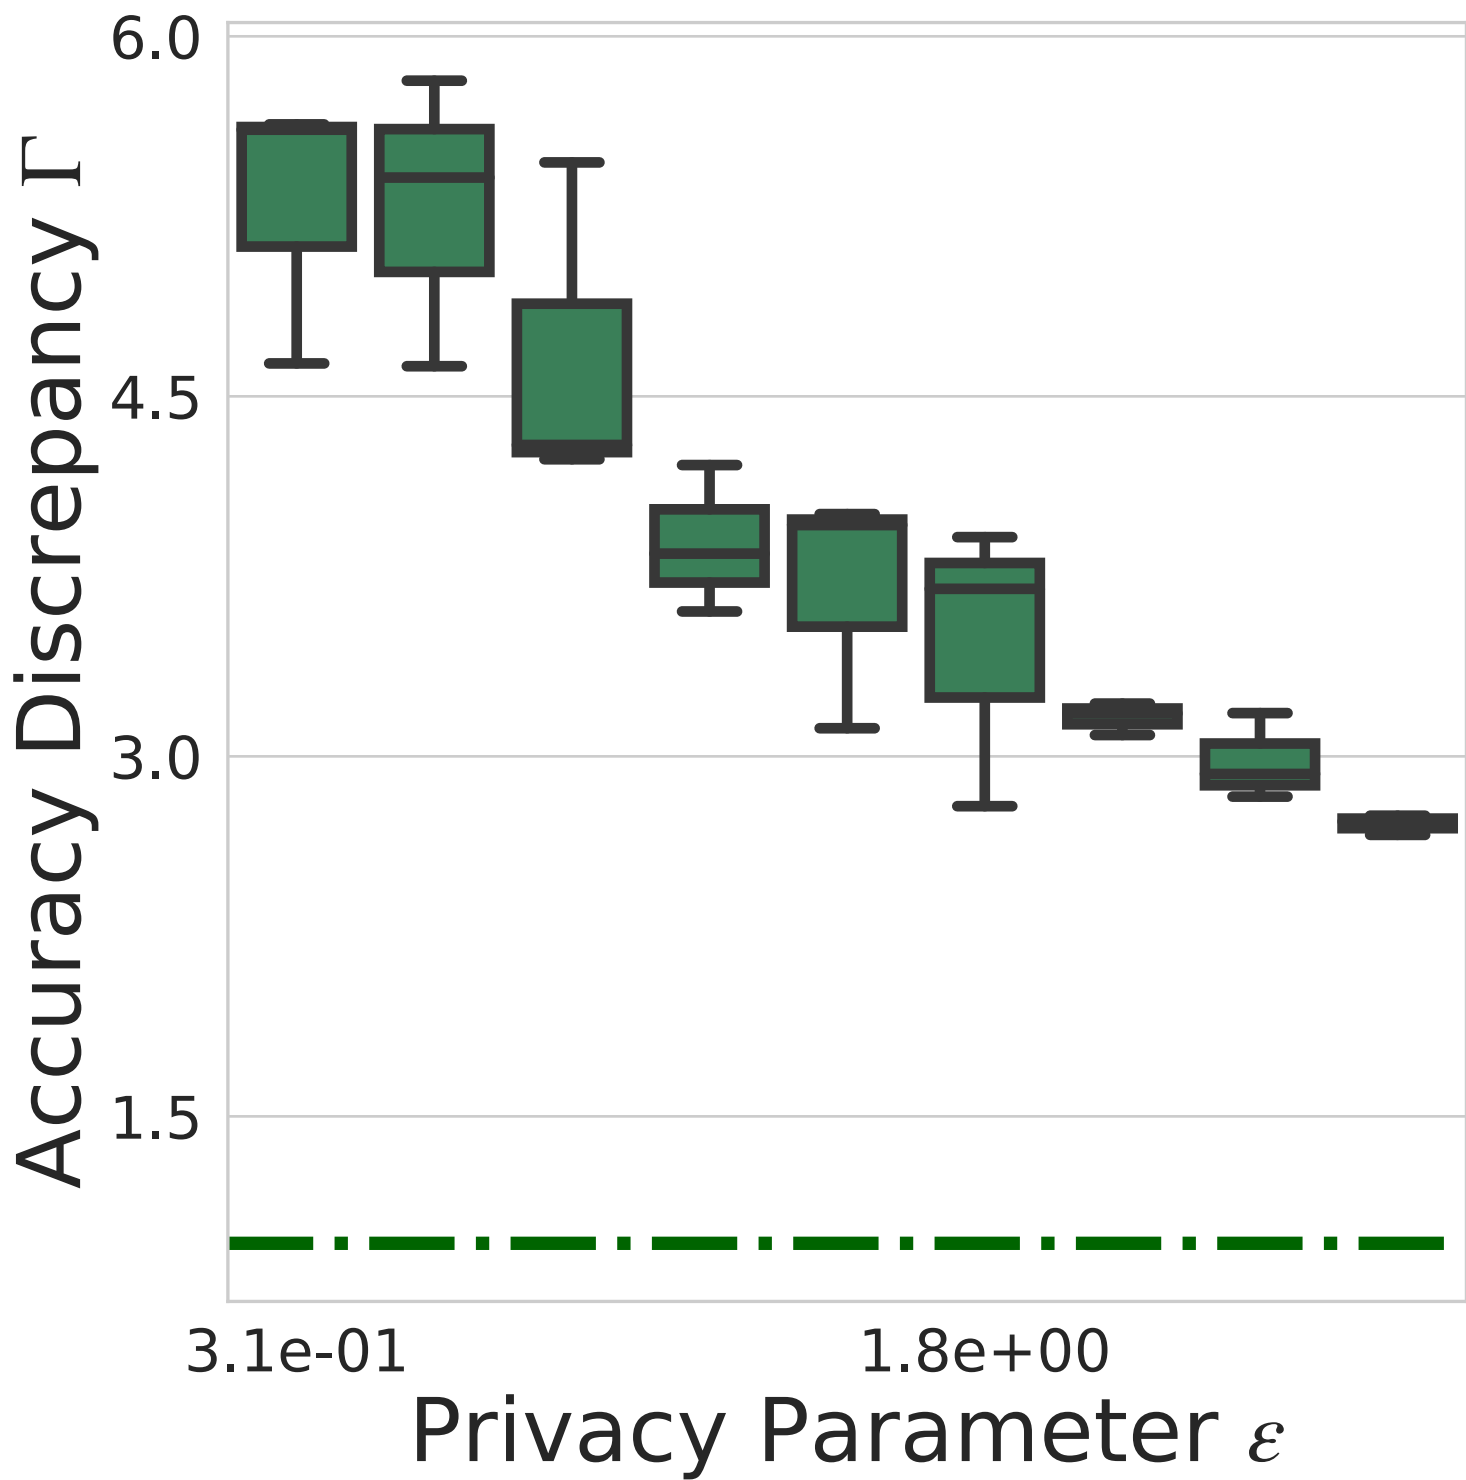

Supplement: supplementary_material [file attachment]

Accuracy Discrepancy  $\Gamma$

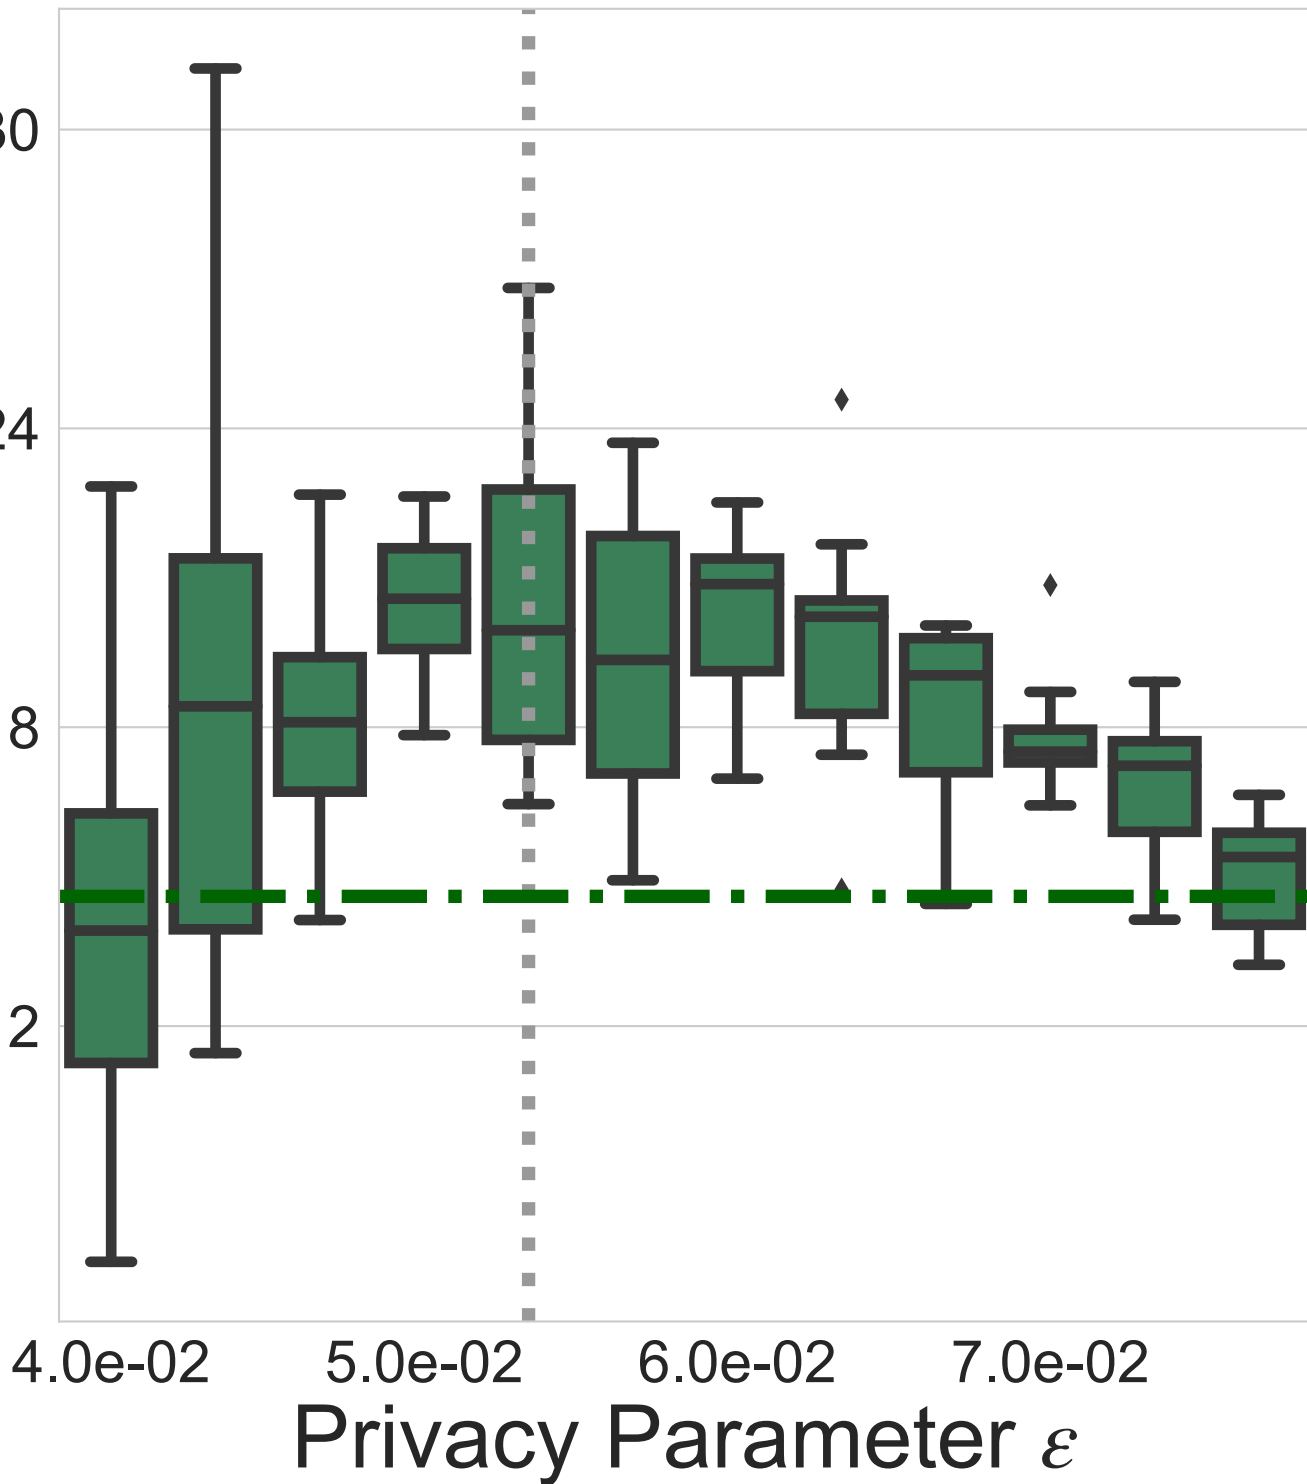

Supplement: supplementary_material [file attachment]

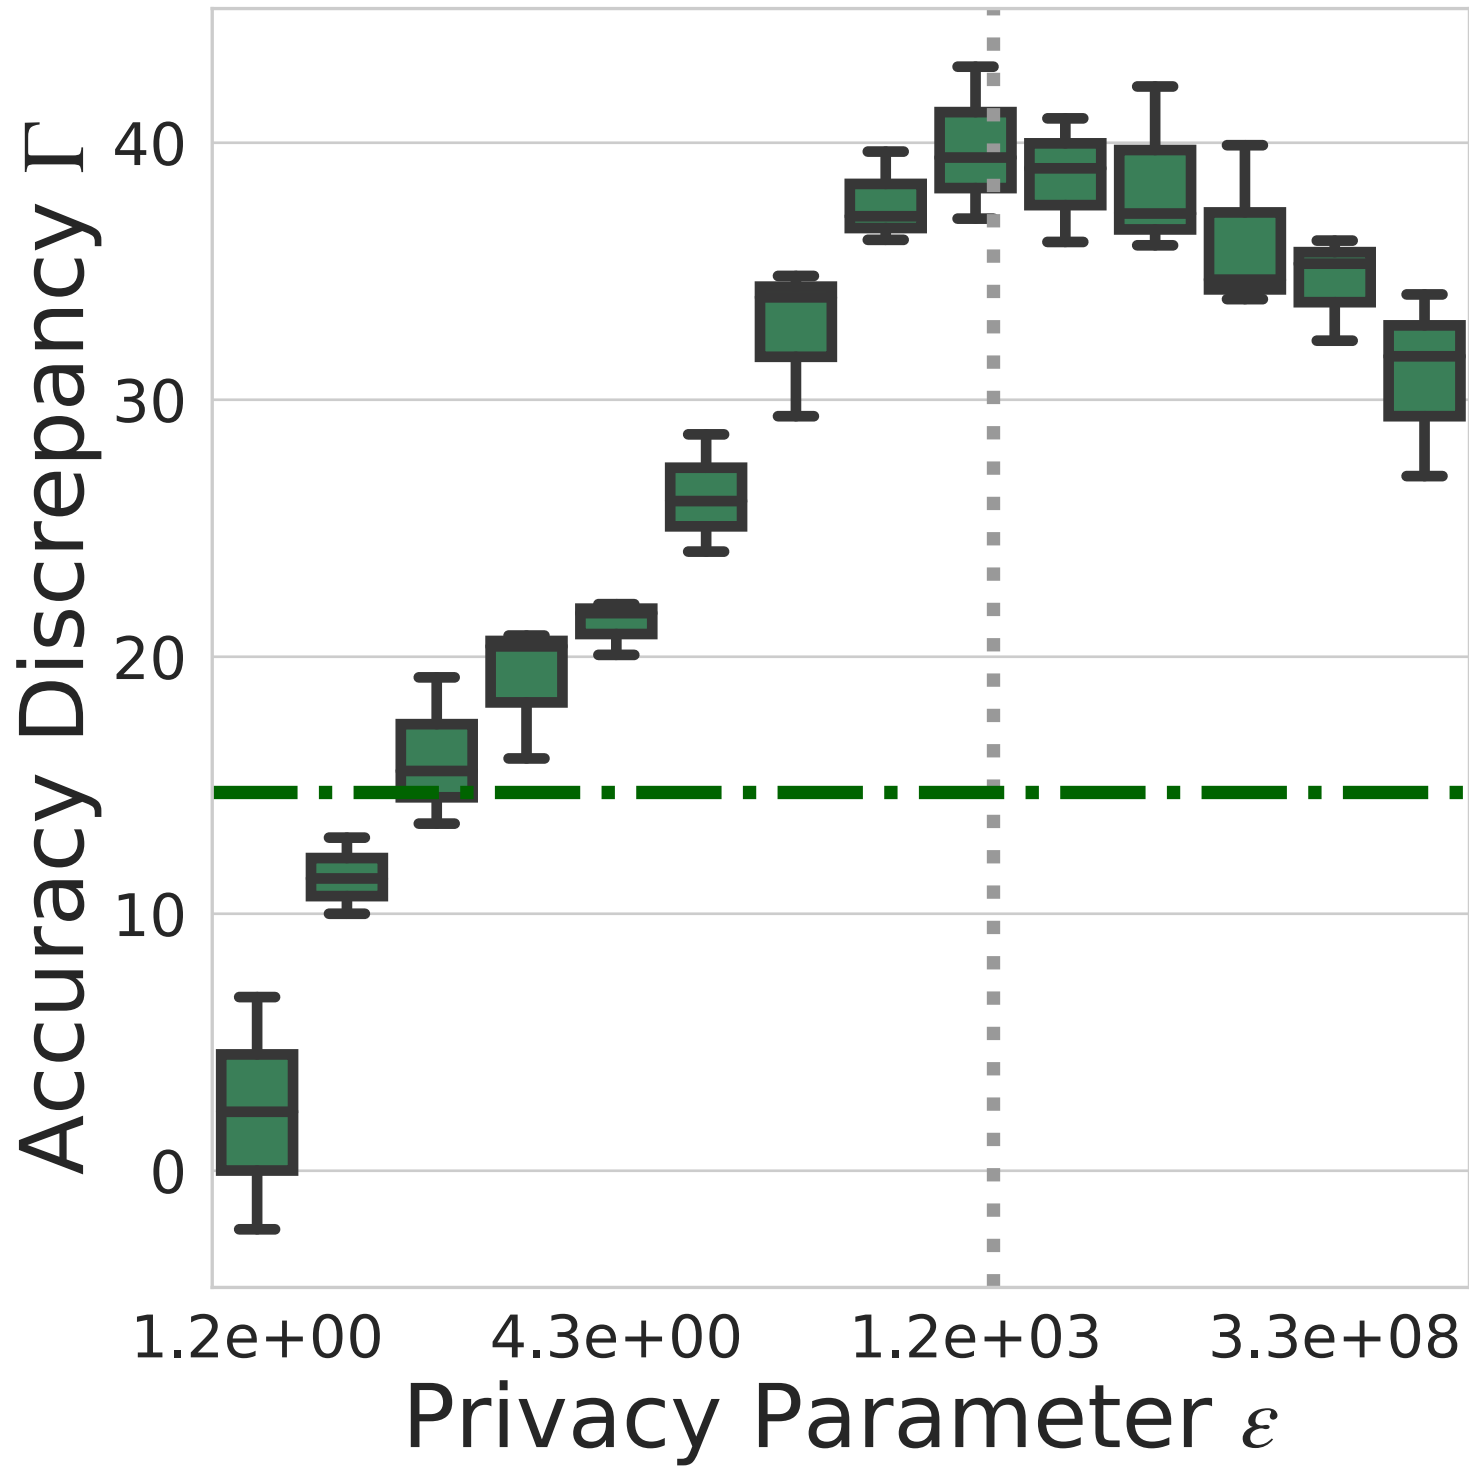

Supplement: supplementary_material [file attachment]

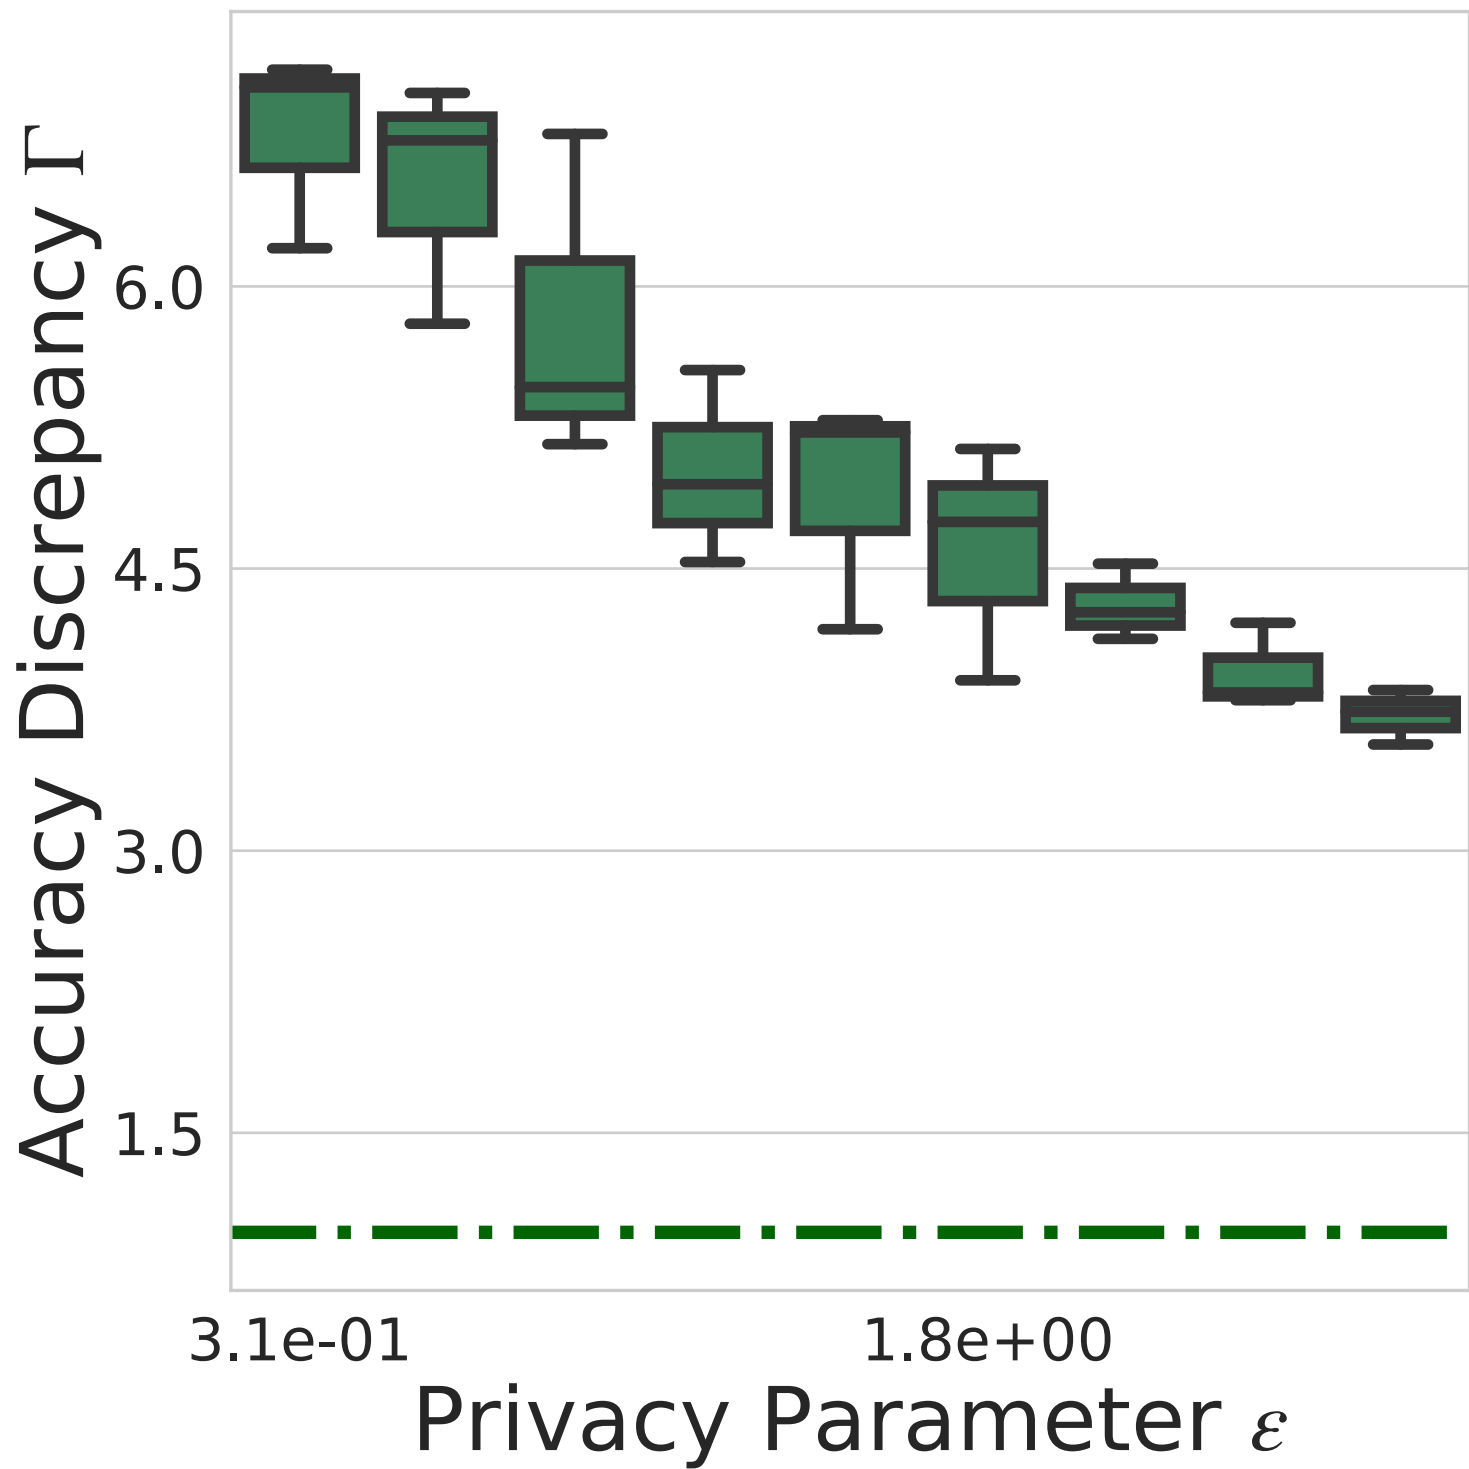

Supplement: supplementary_material [file attachment]

# of subpopulations

100  
80  
60  
40  
20  
0

$10^0$

$10^1$

$10^2$

$10^3$

$10^4$

Size of subpopulation

Set A  
Set B

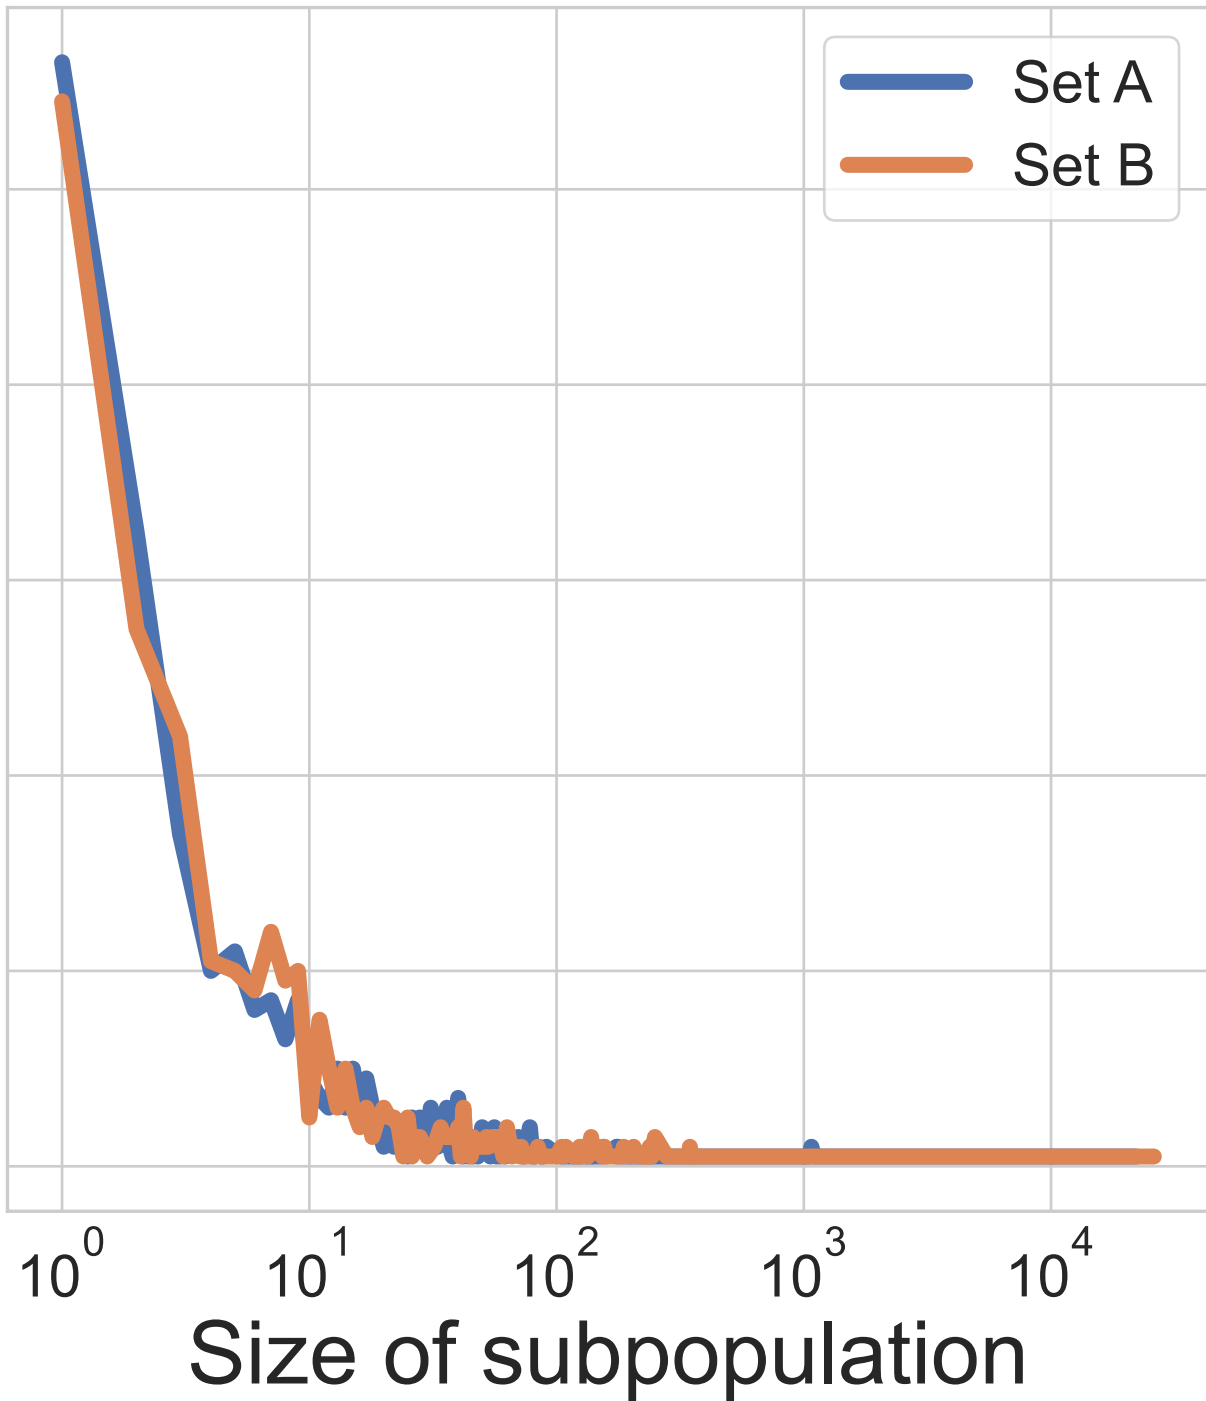

Supplement: supplementary_material [file attachment]

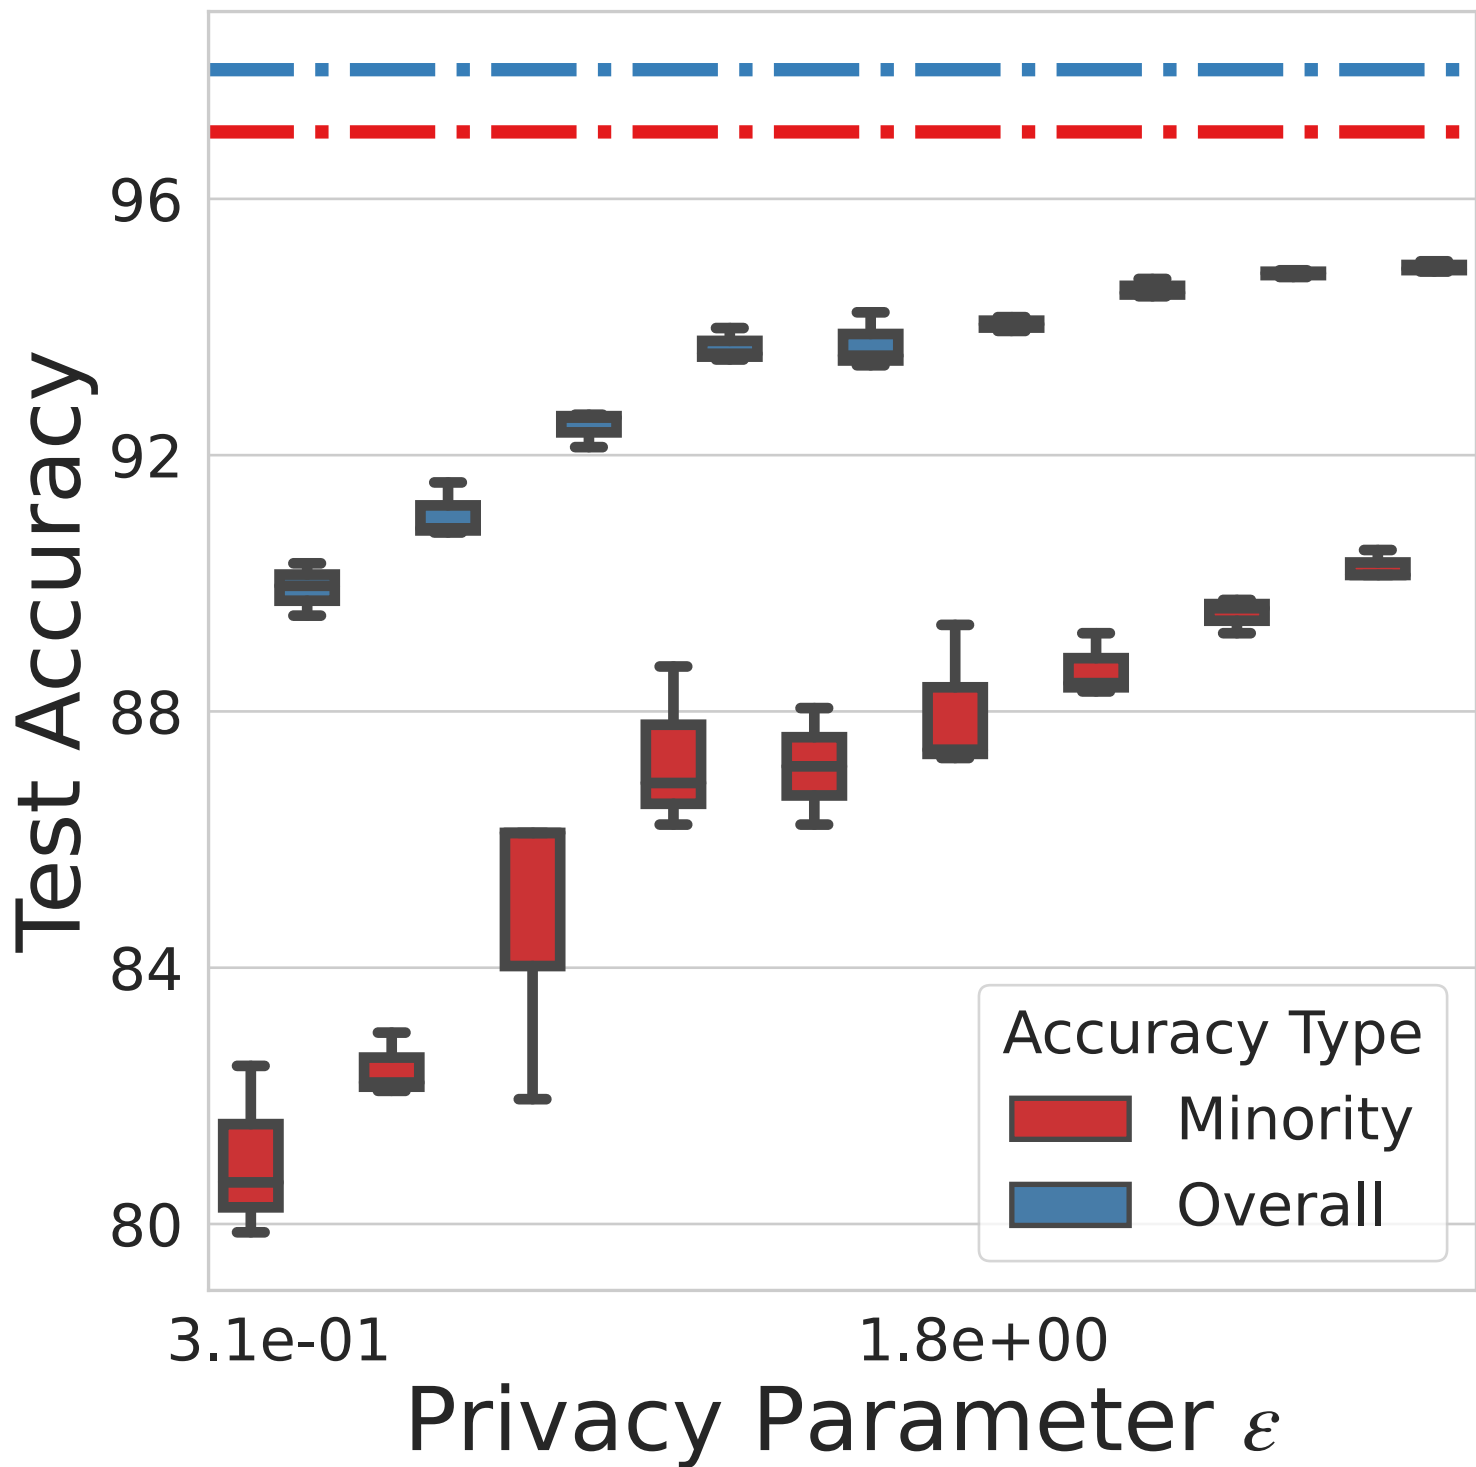

Supplement: supplementary_material [file attachment]

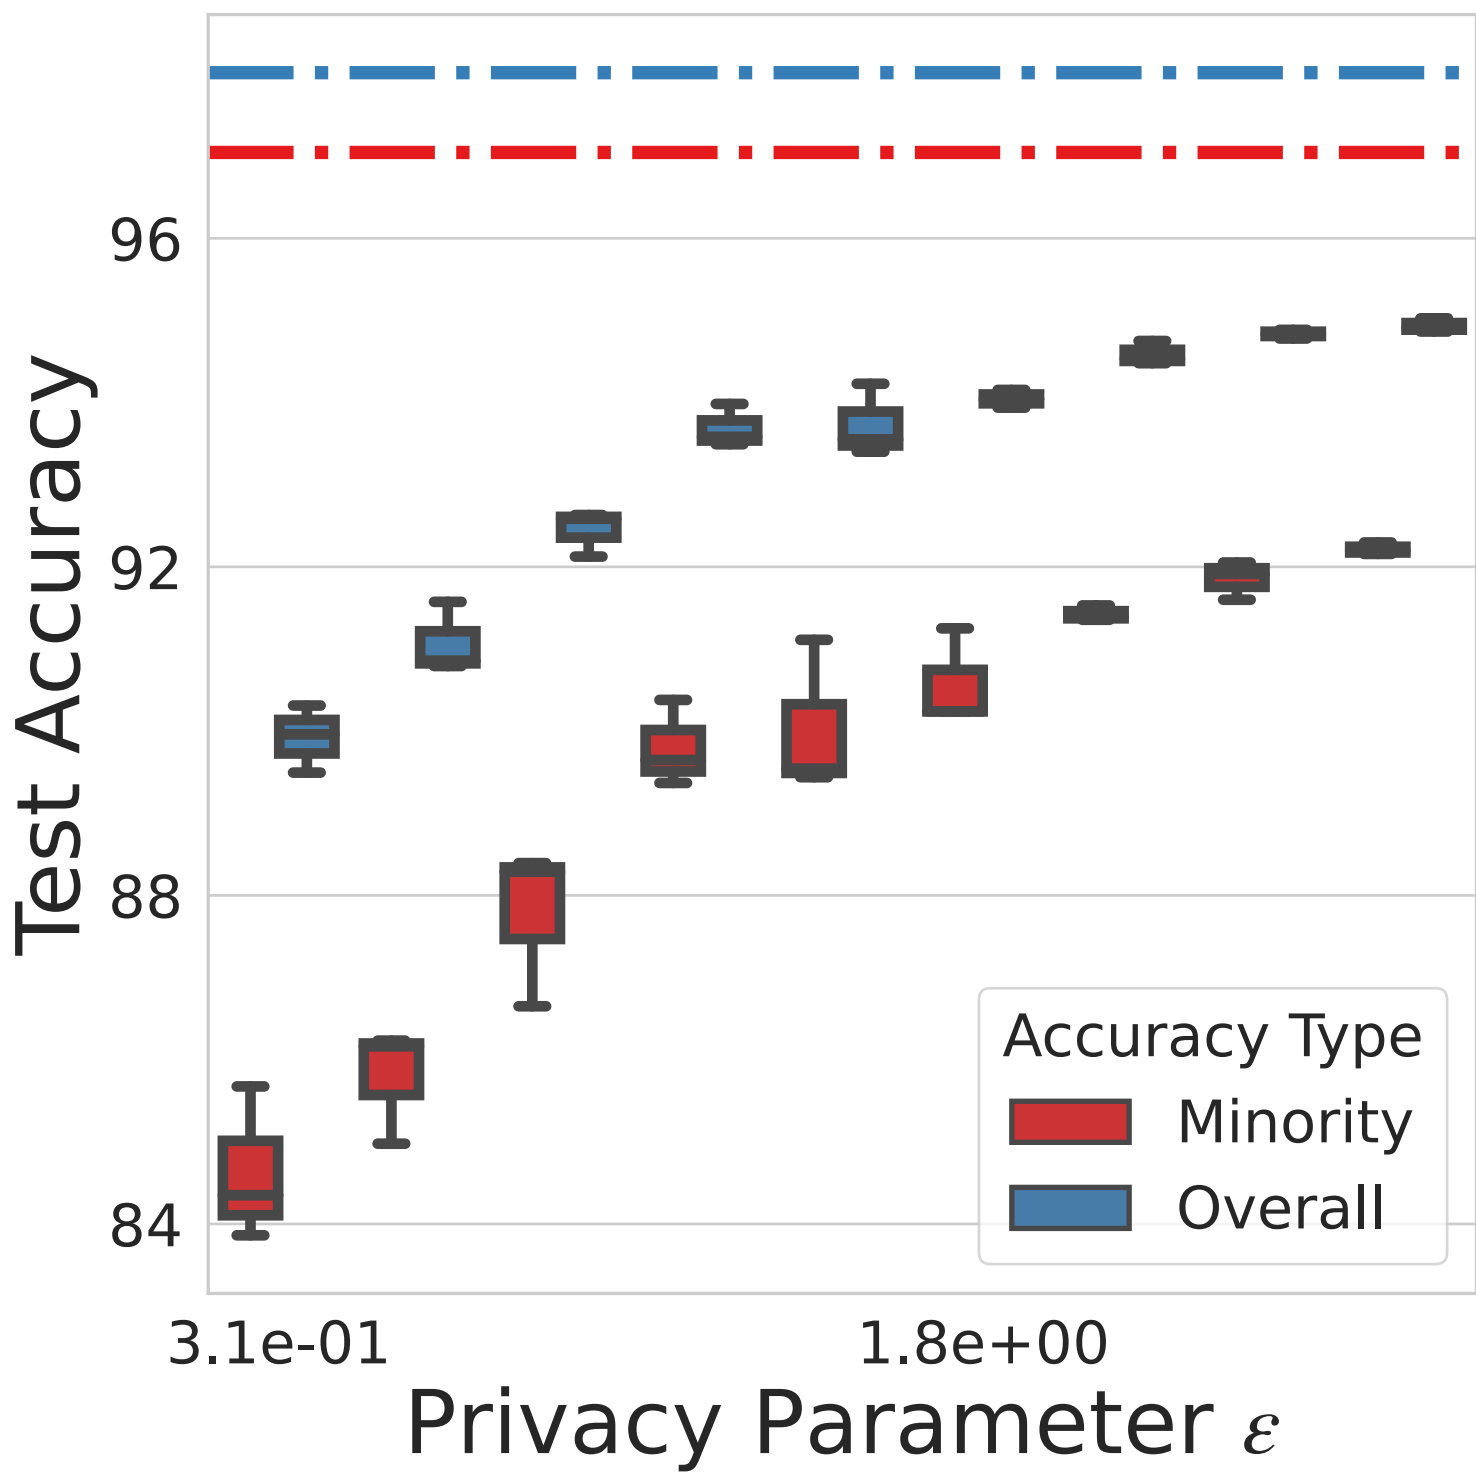

Supplement: supplementary_material [file attachment]

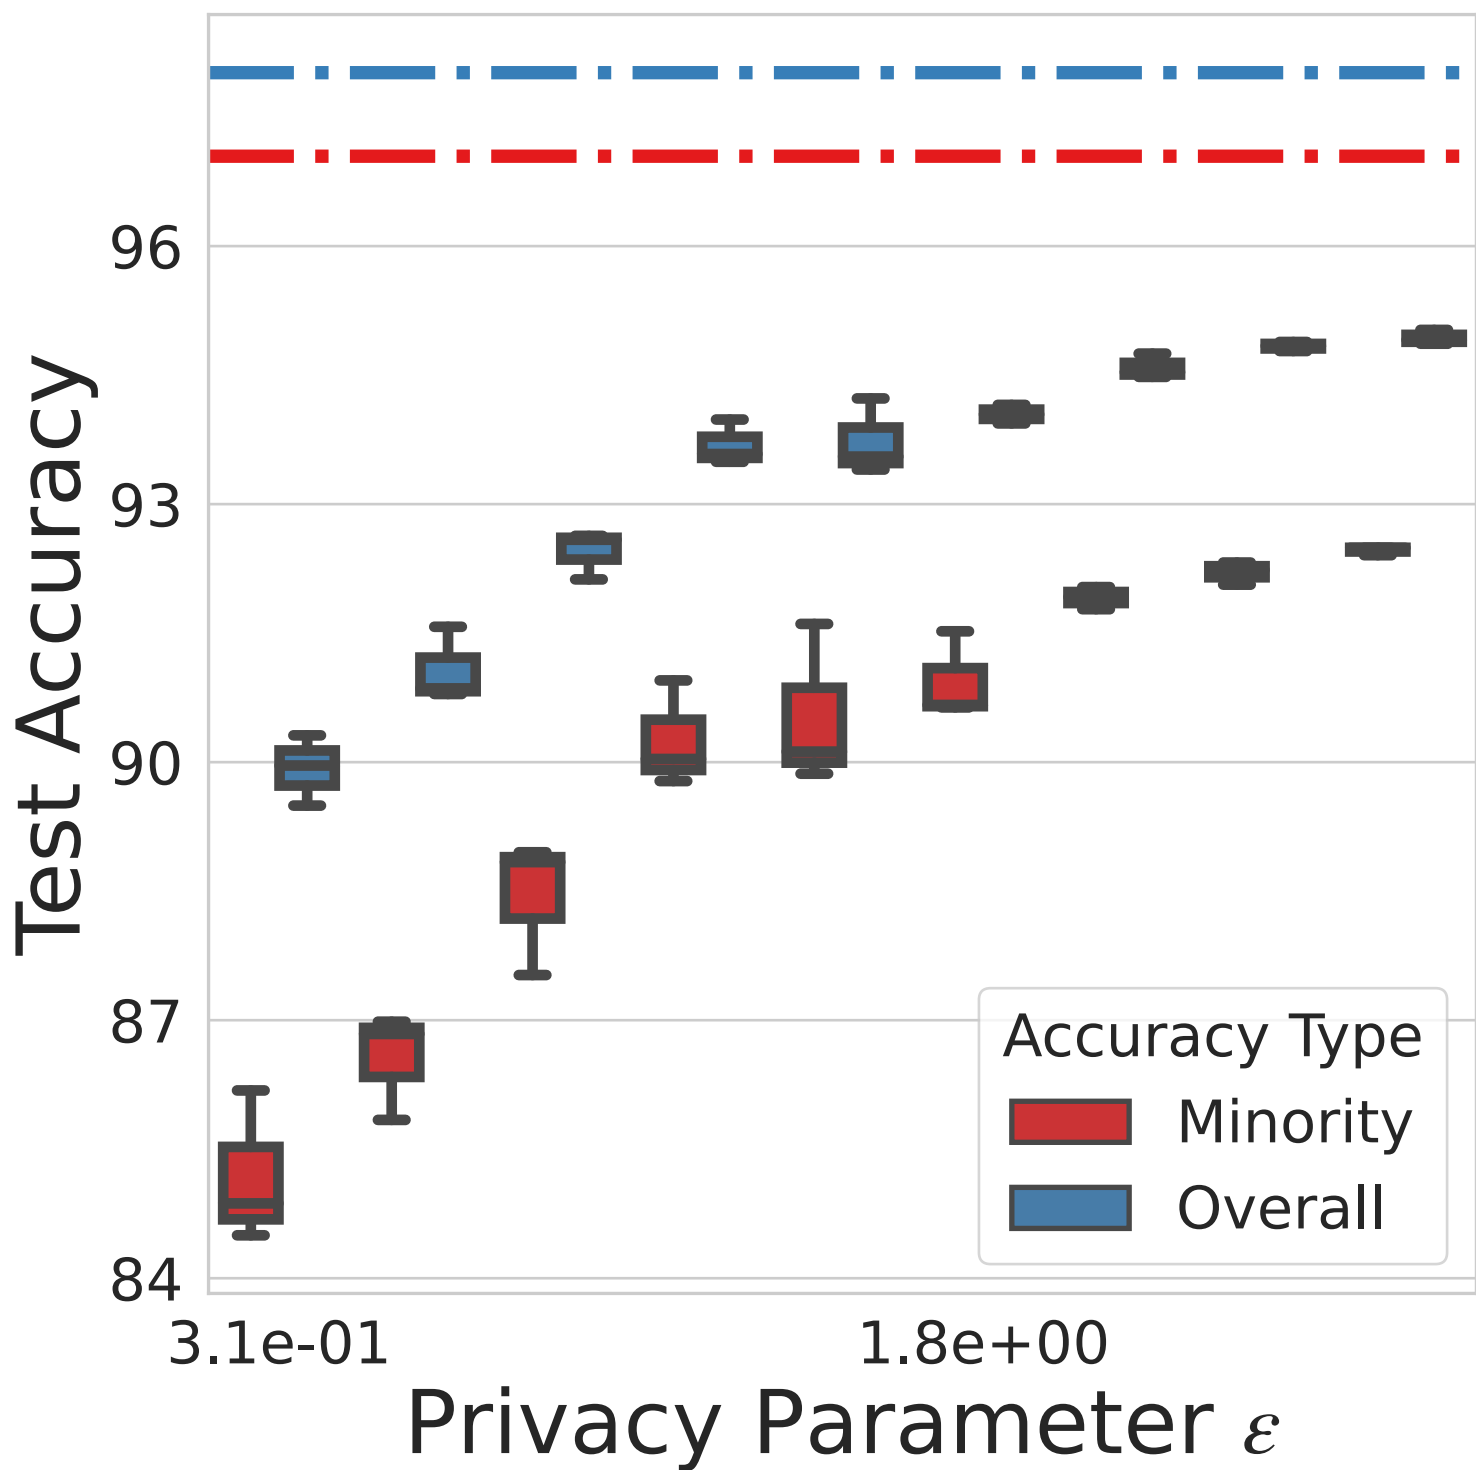

Supplement: supplementary_material [file attachment]

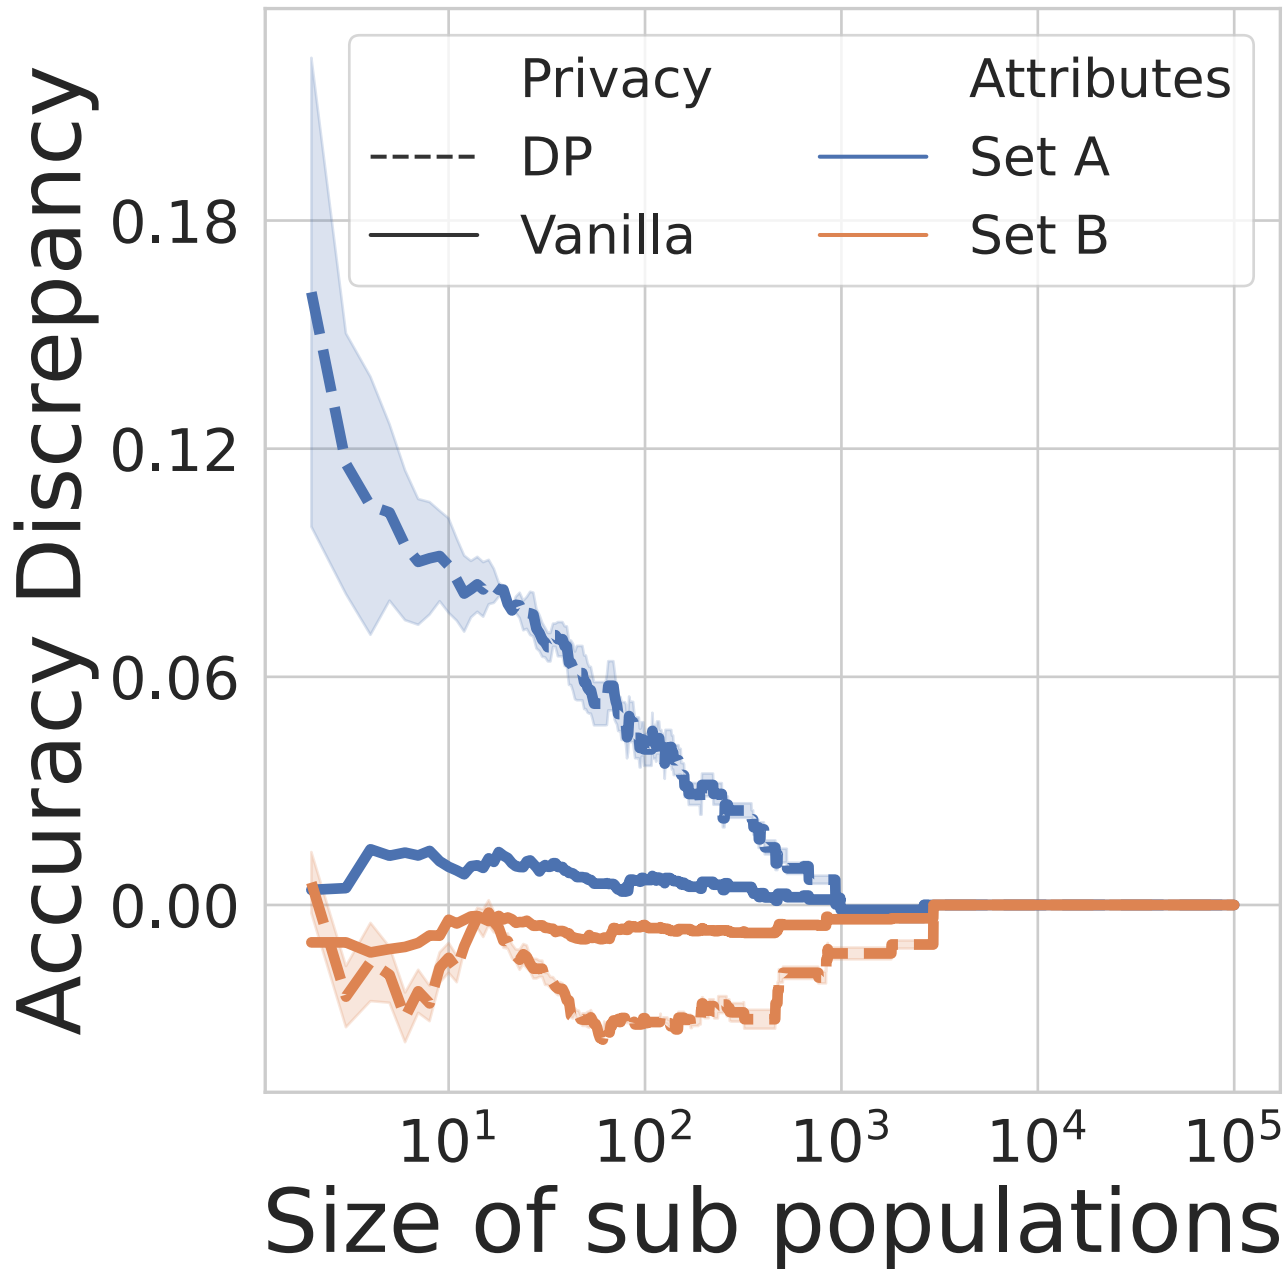

Supplement: supplementary_material [file attachment]

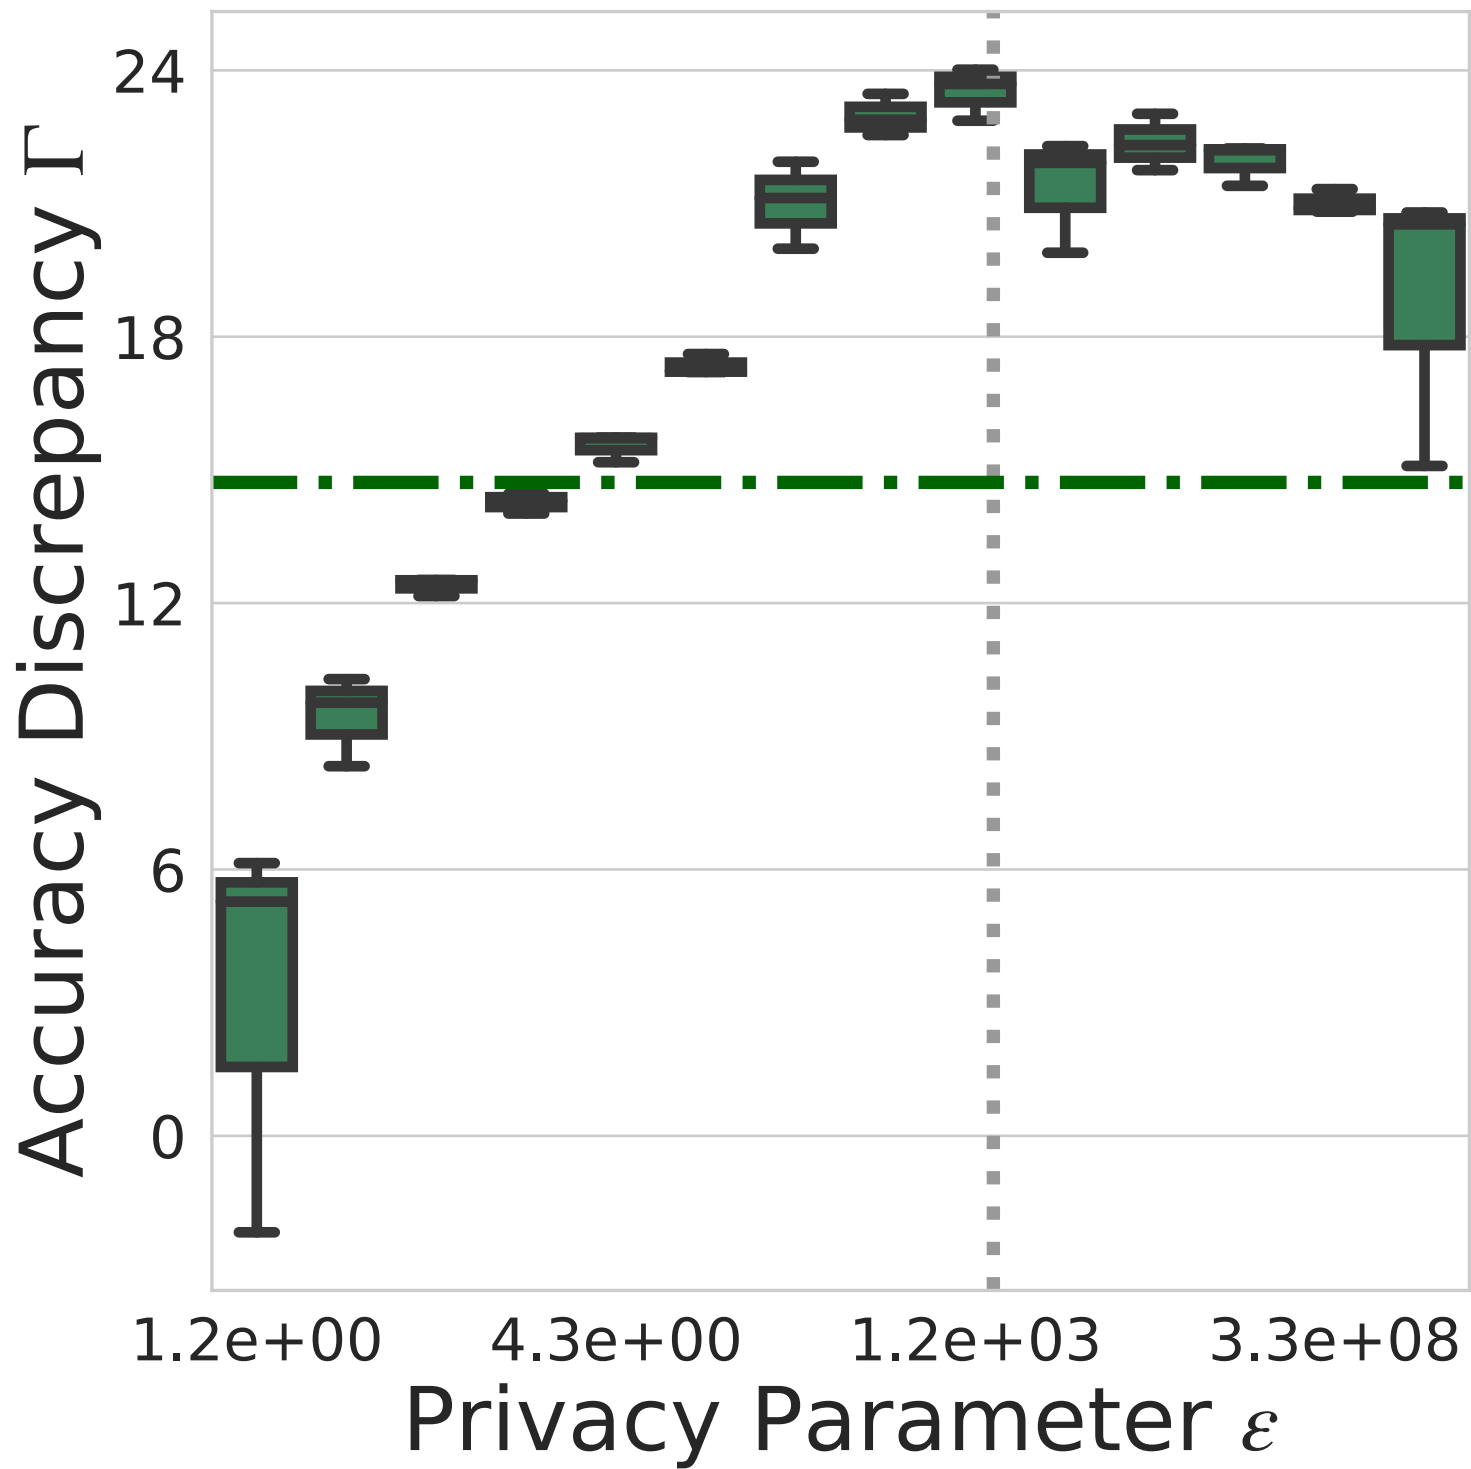

Supplement: supplementary_material [file attachment]

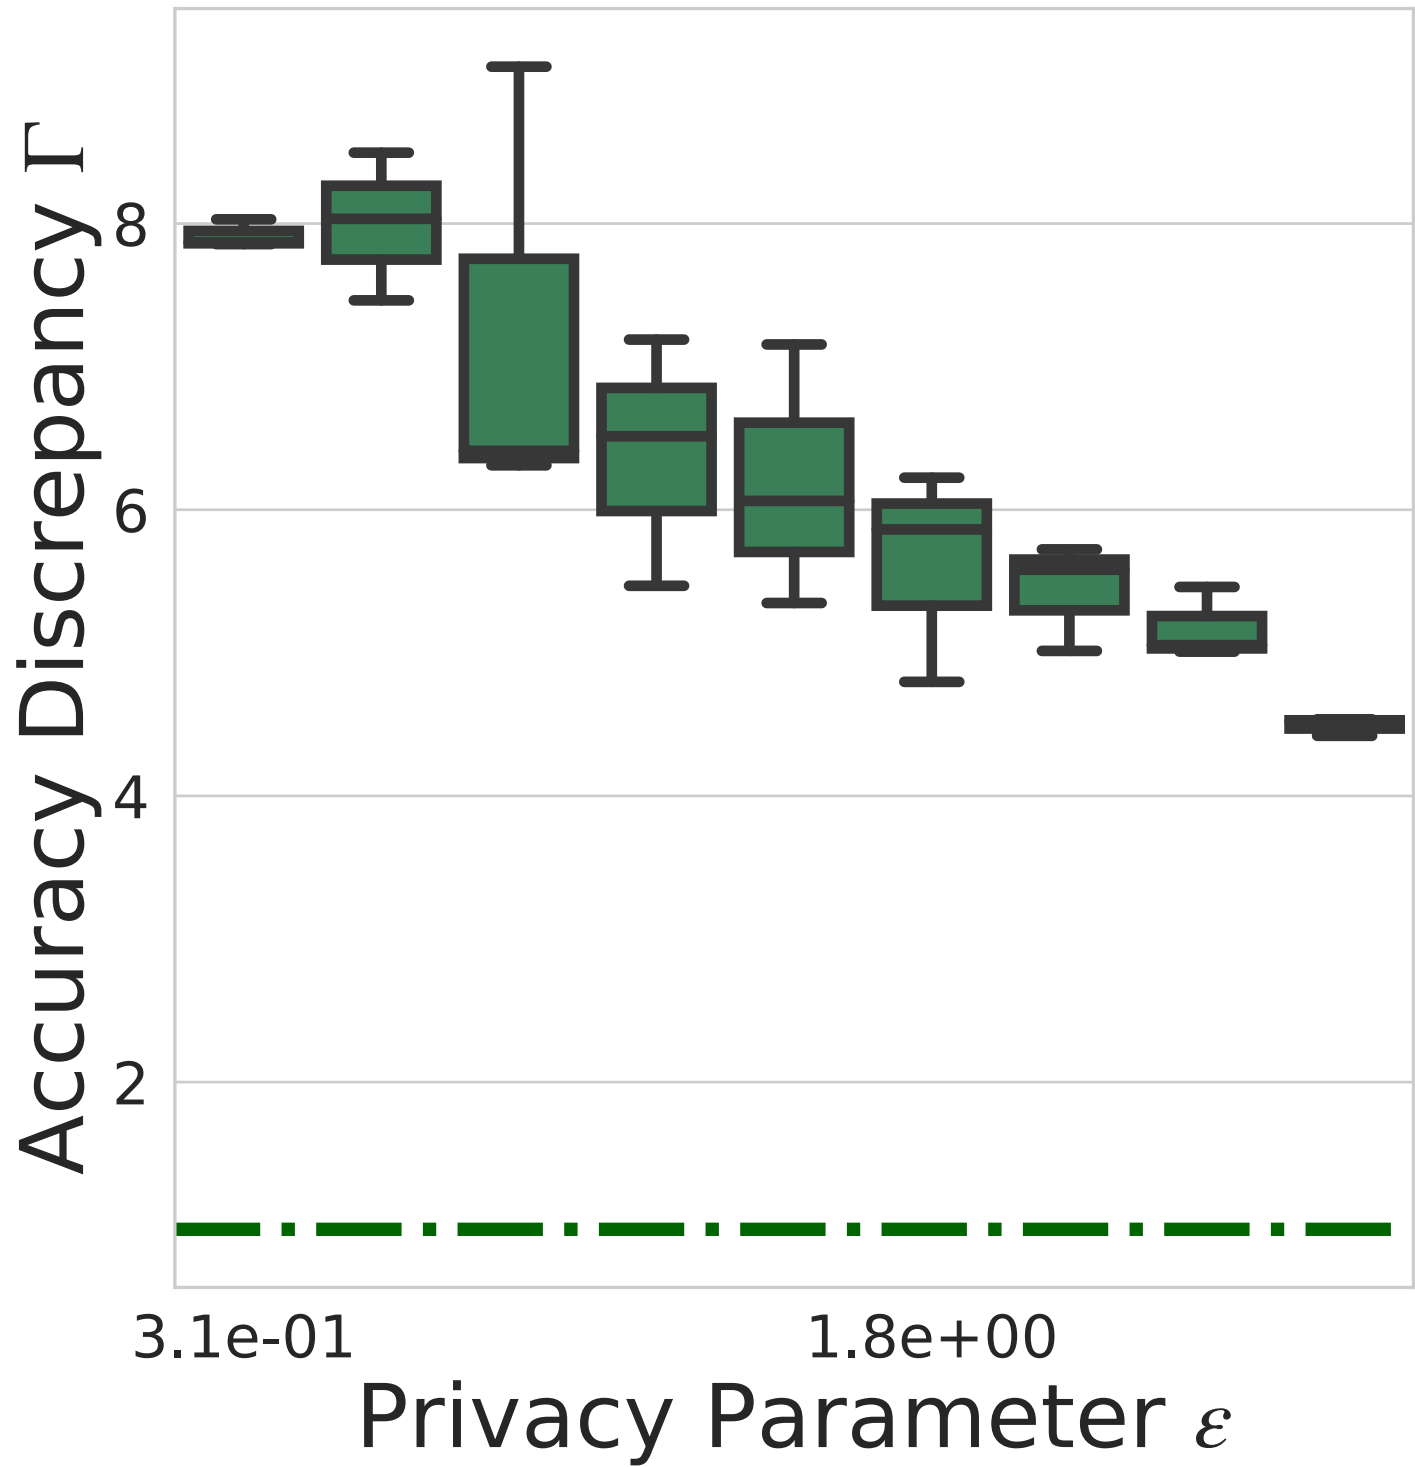

Supplement: supplementary_material [file attachment]

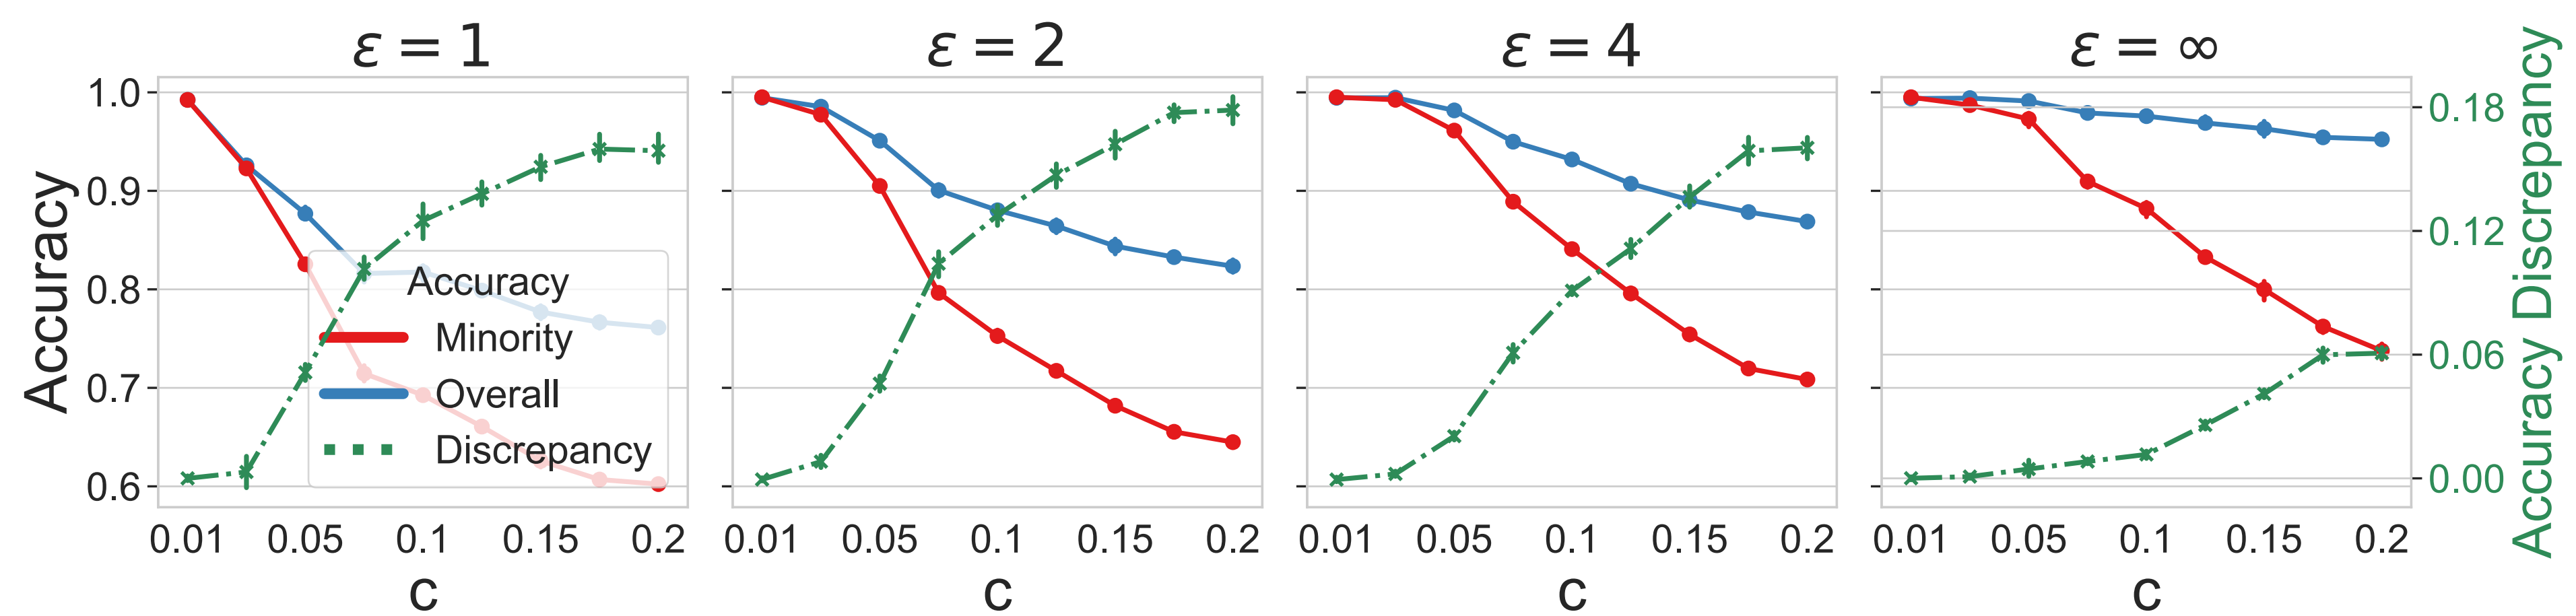

Supplement: supplementary_material [file attachment]

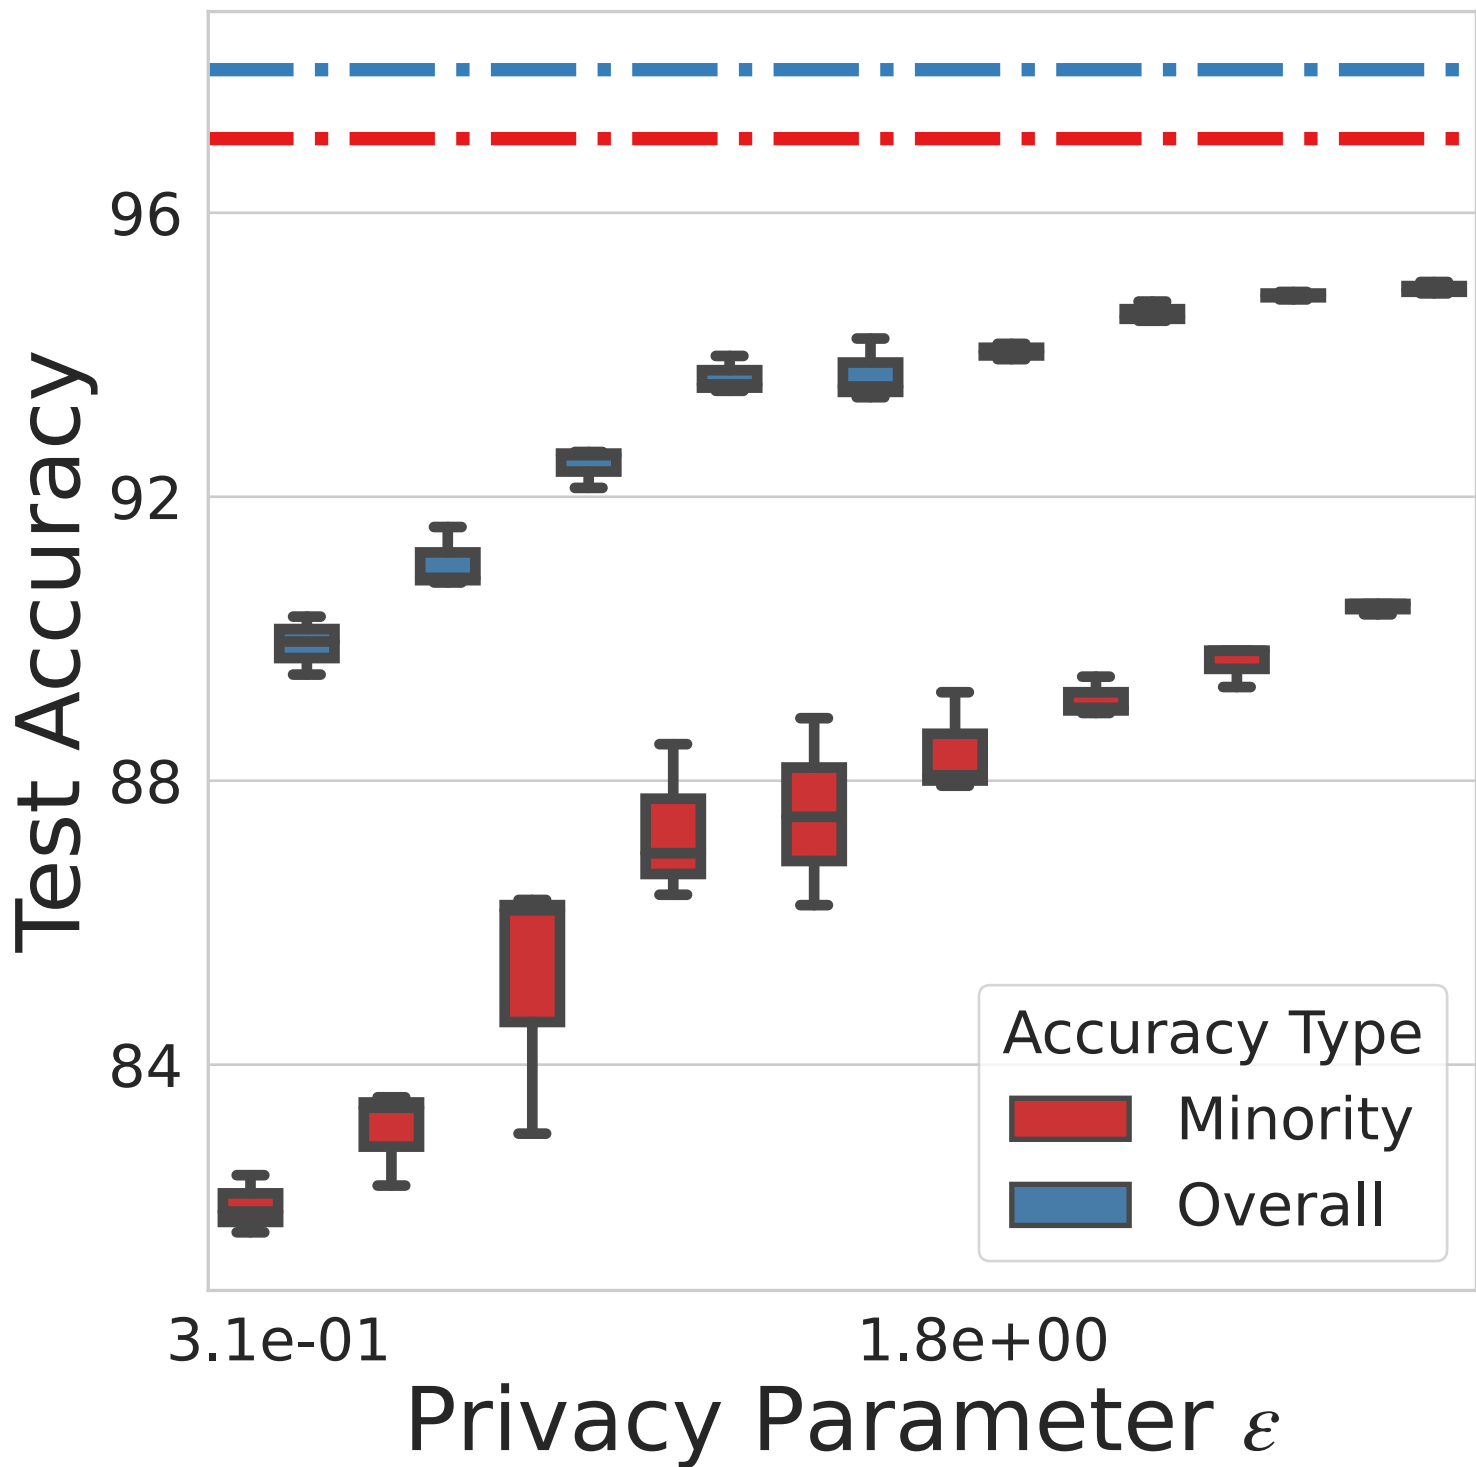

Supplement: supplementary_material [file attachment]

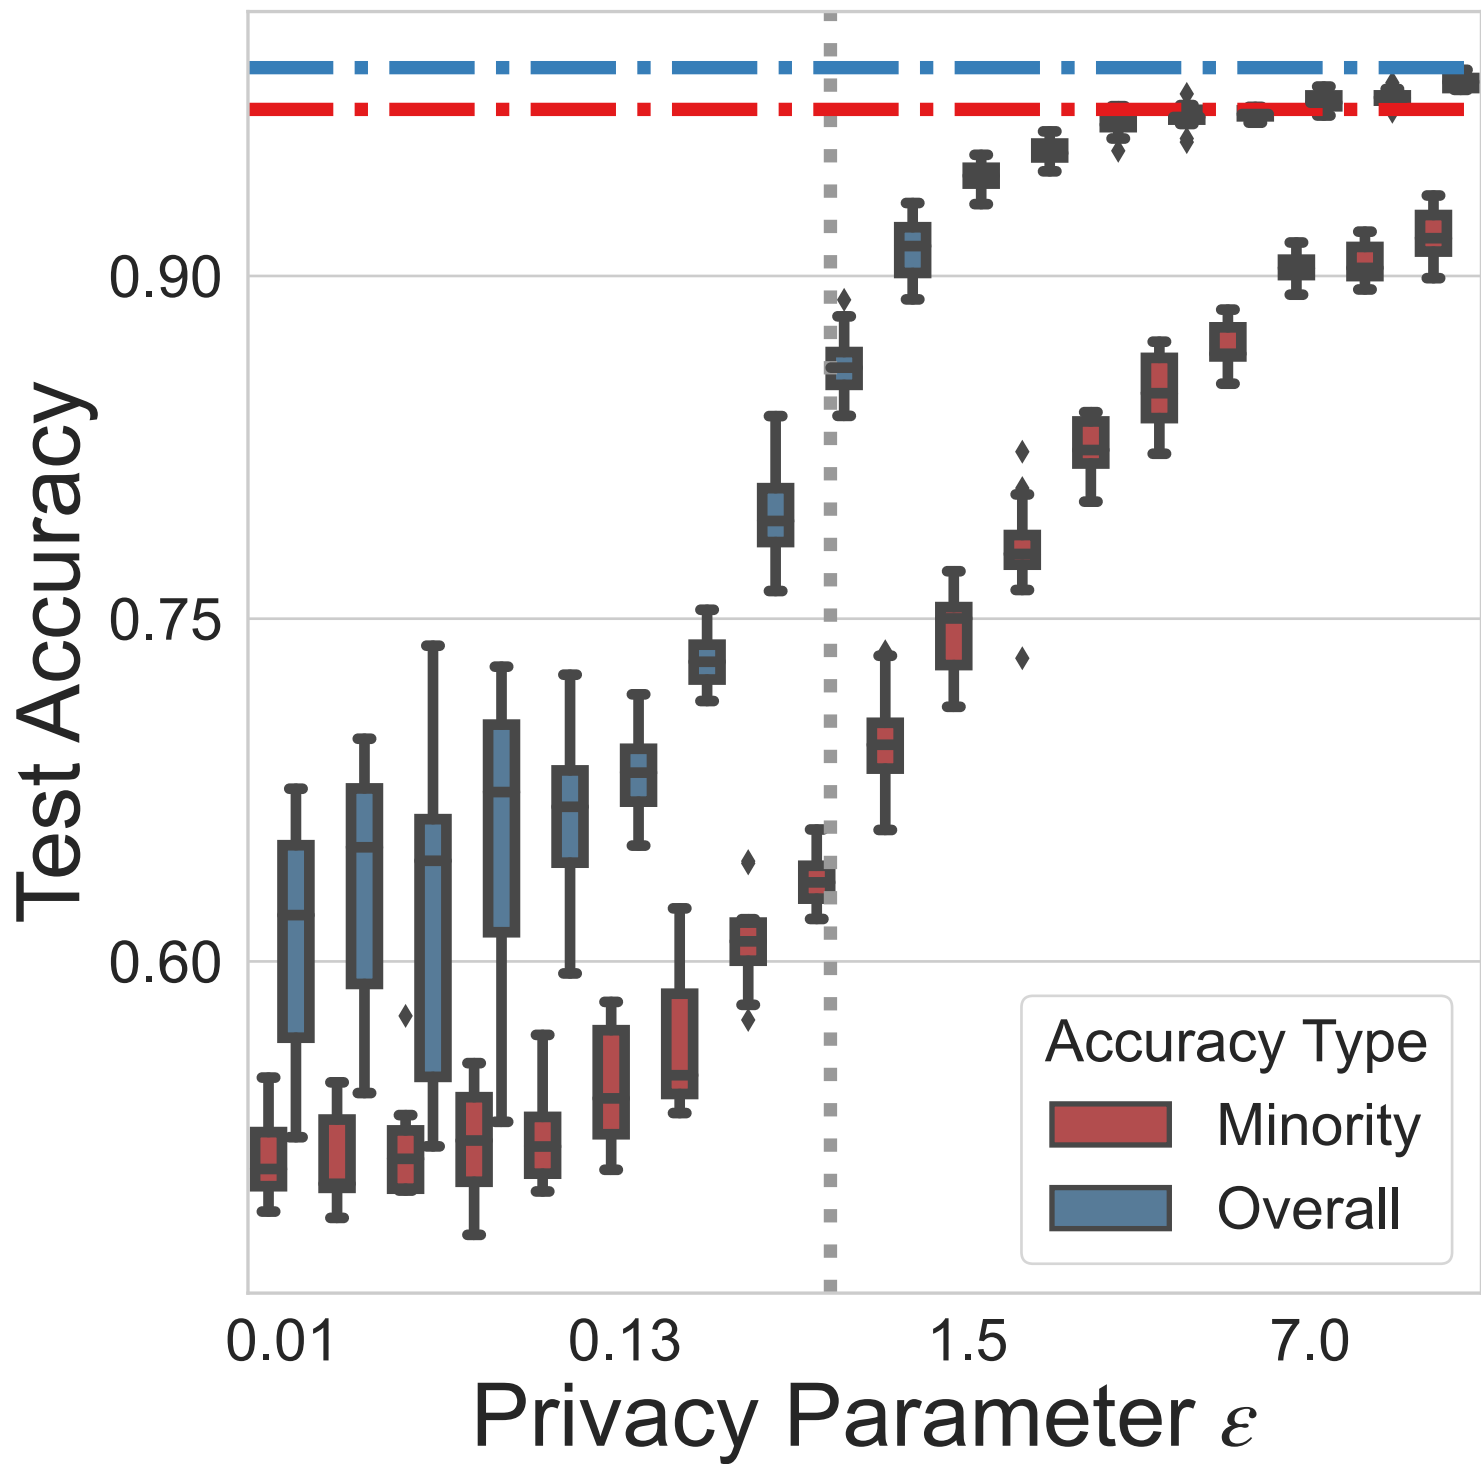

Supplement: supplementary_material [file attachment]

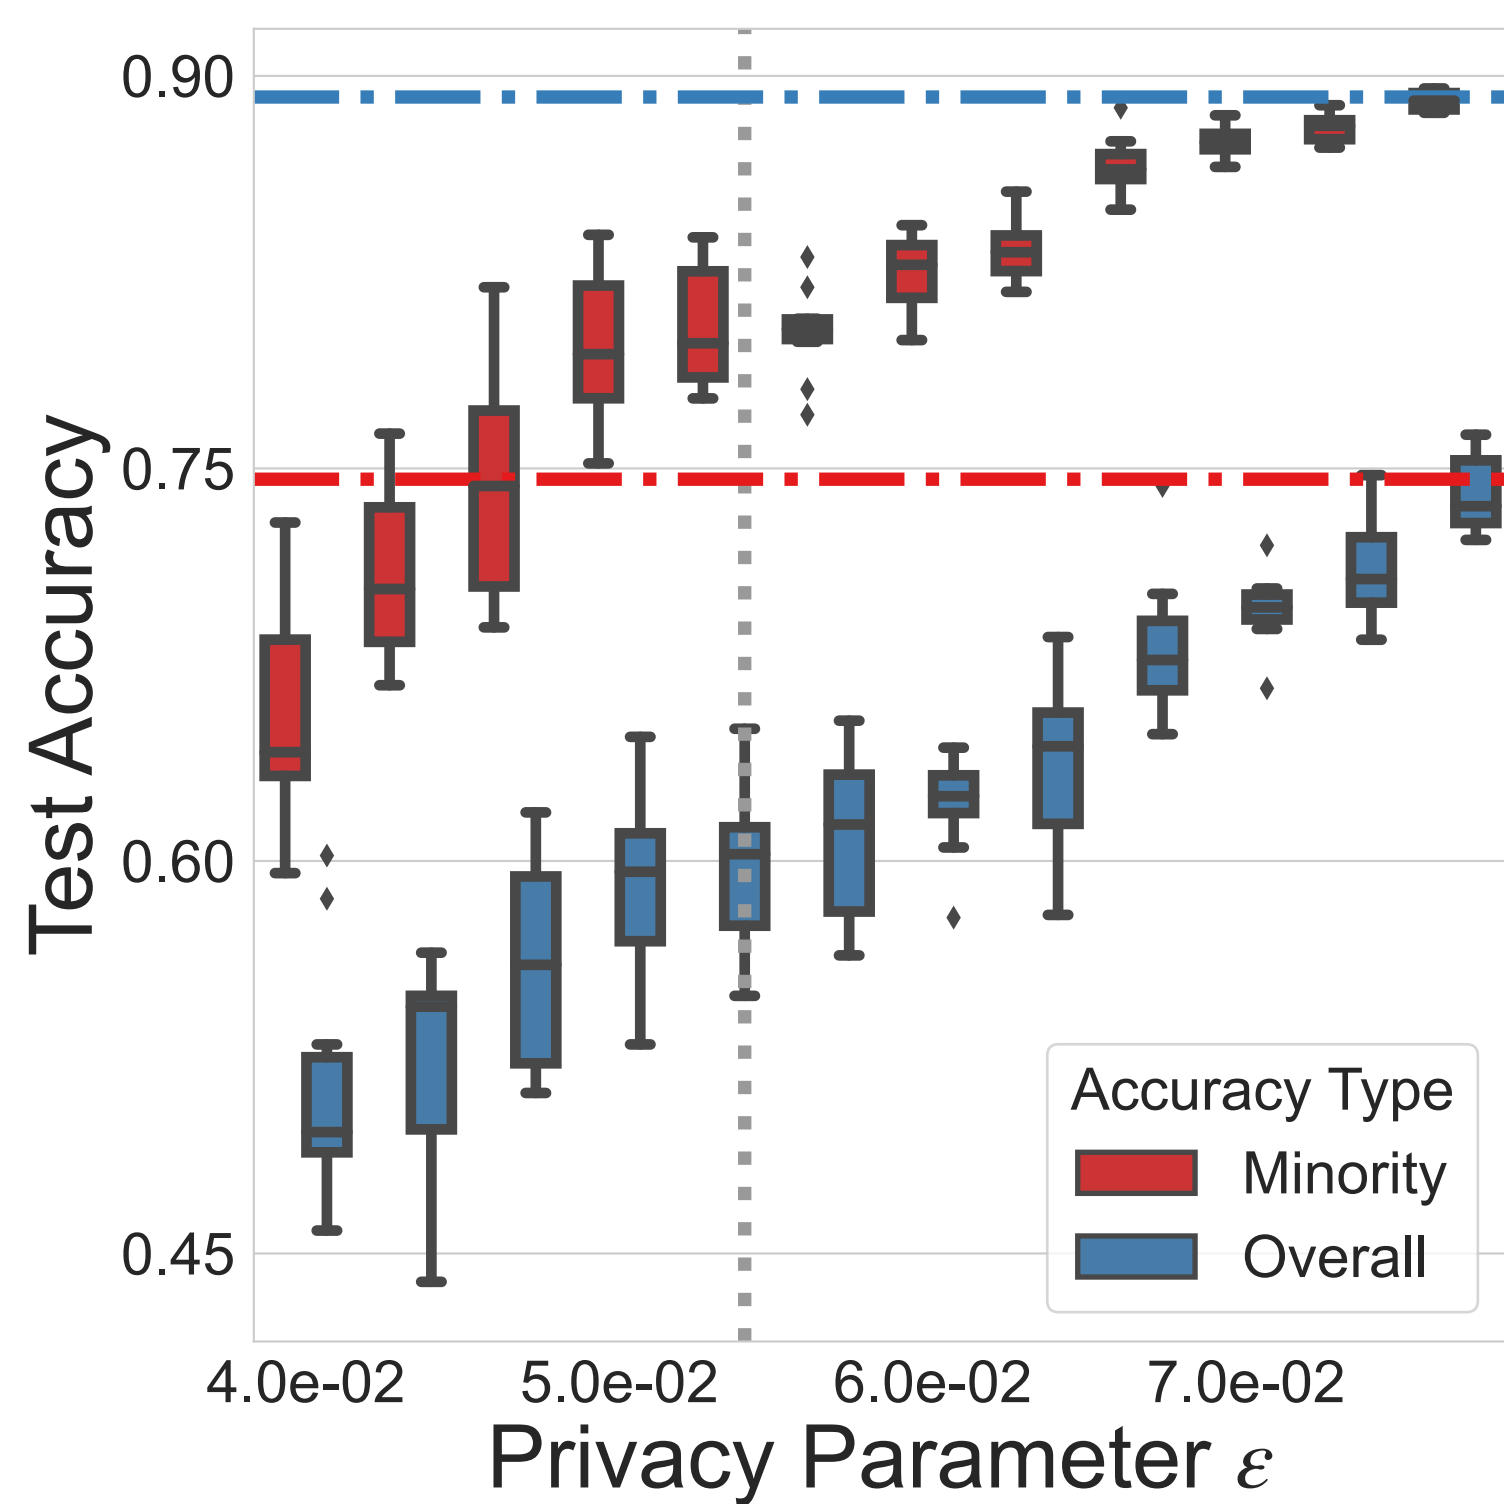

Supplement: supplementary_material [file attachment]

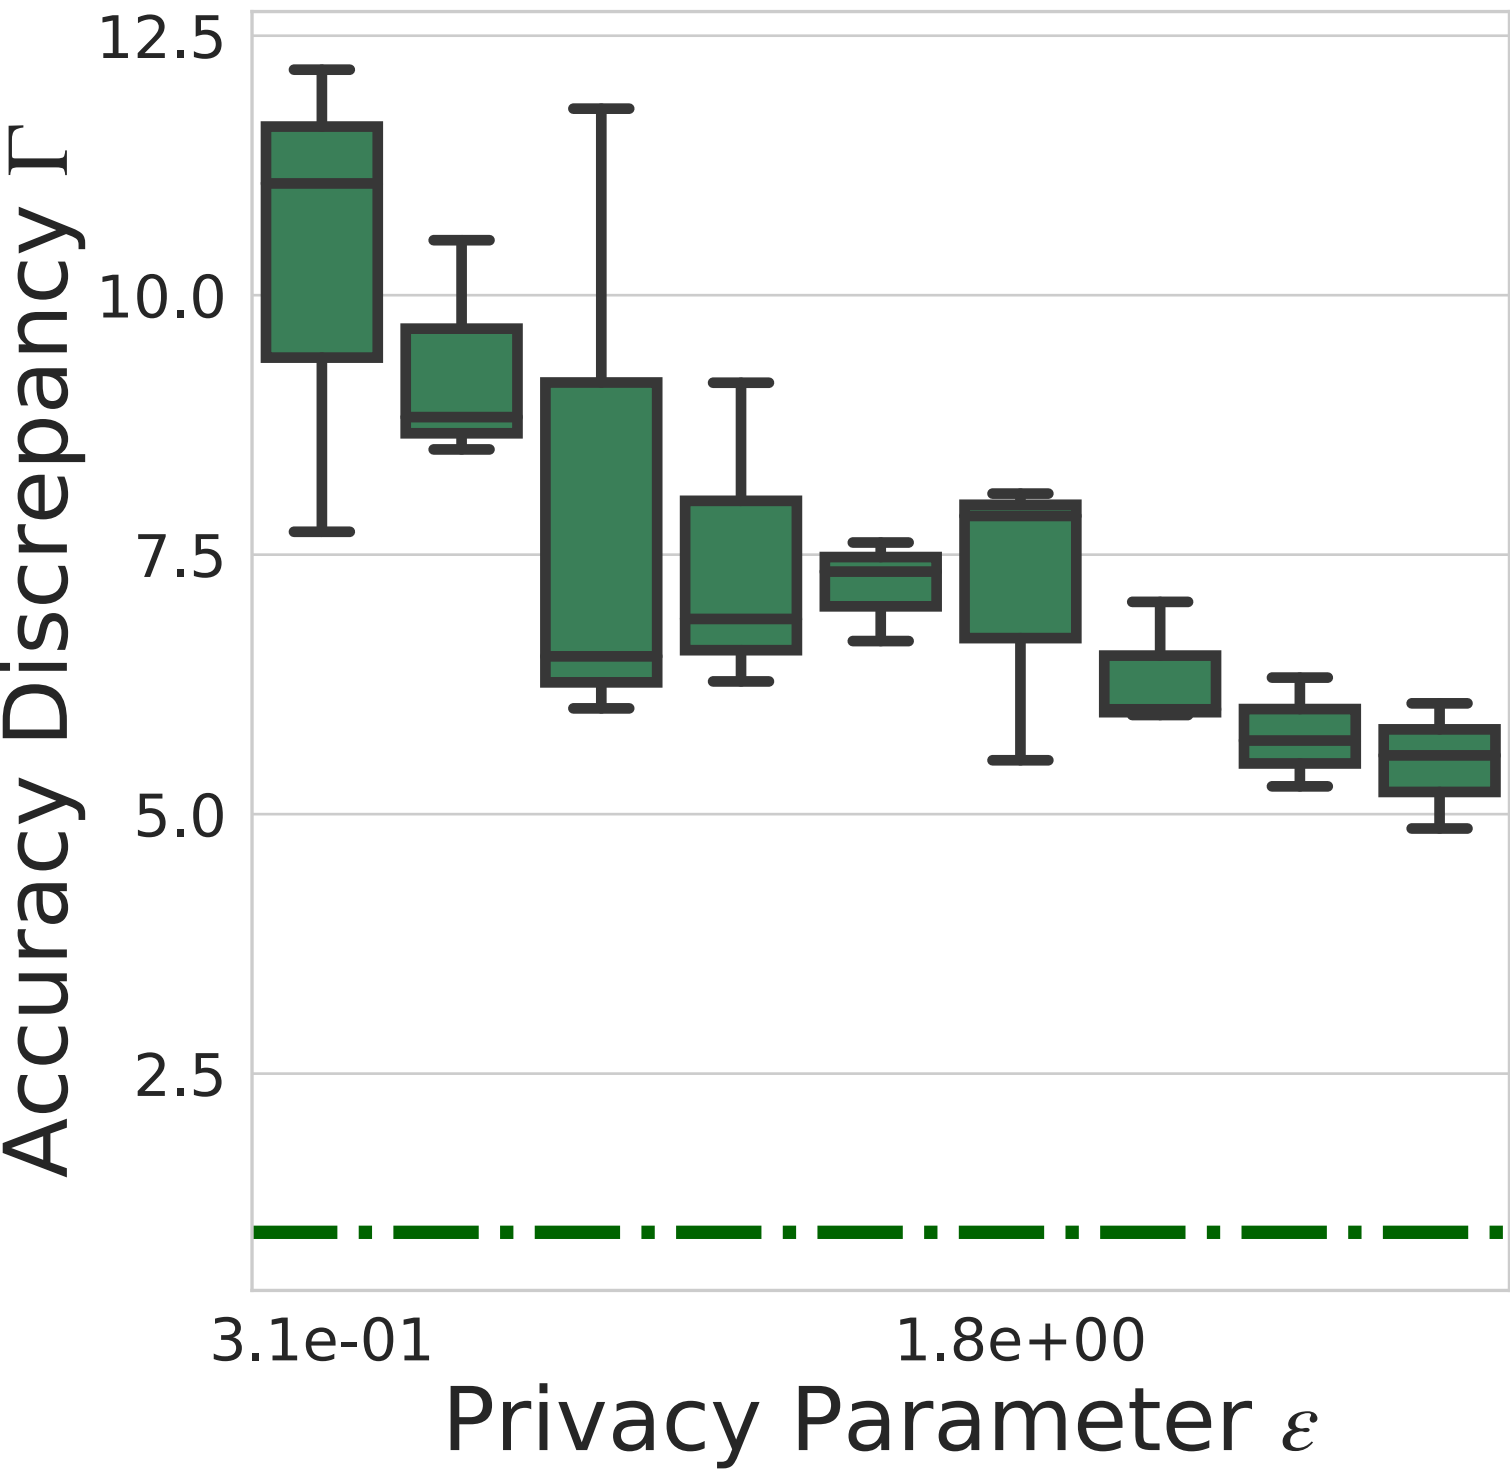

Supplement: supplementary_material [file attachment]

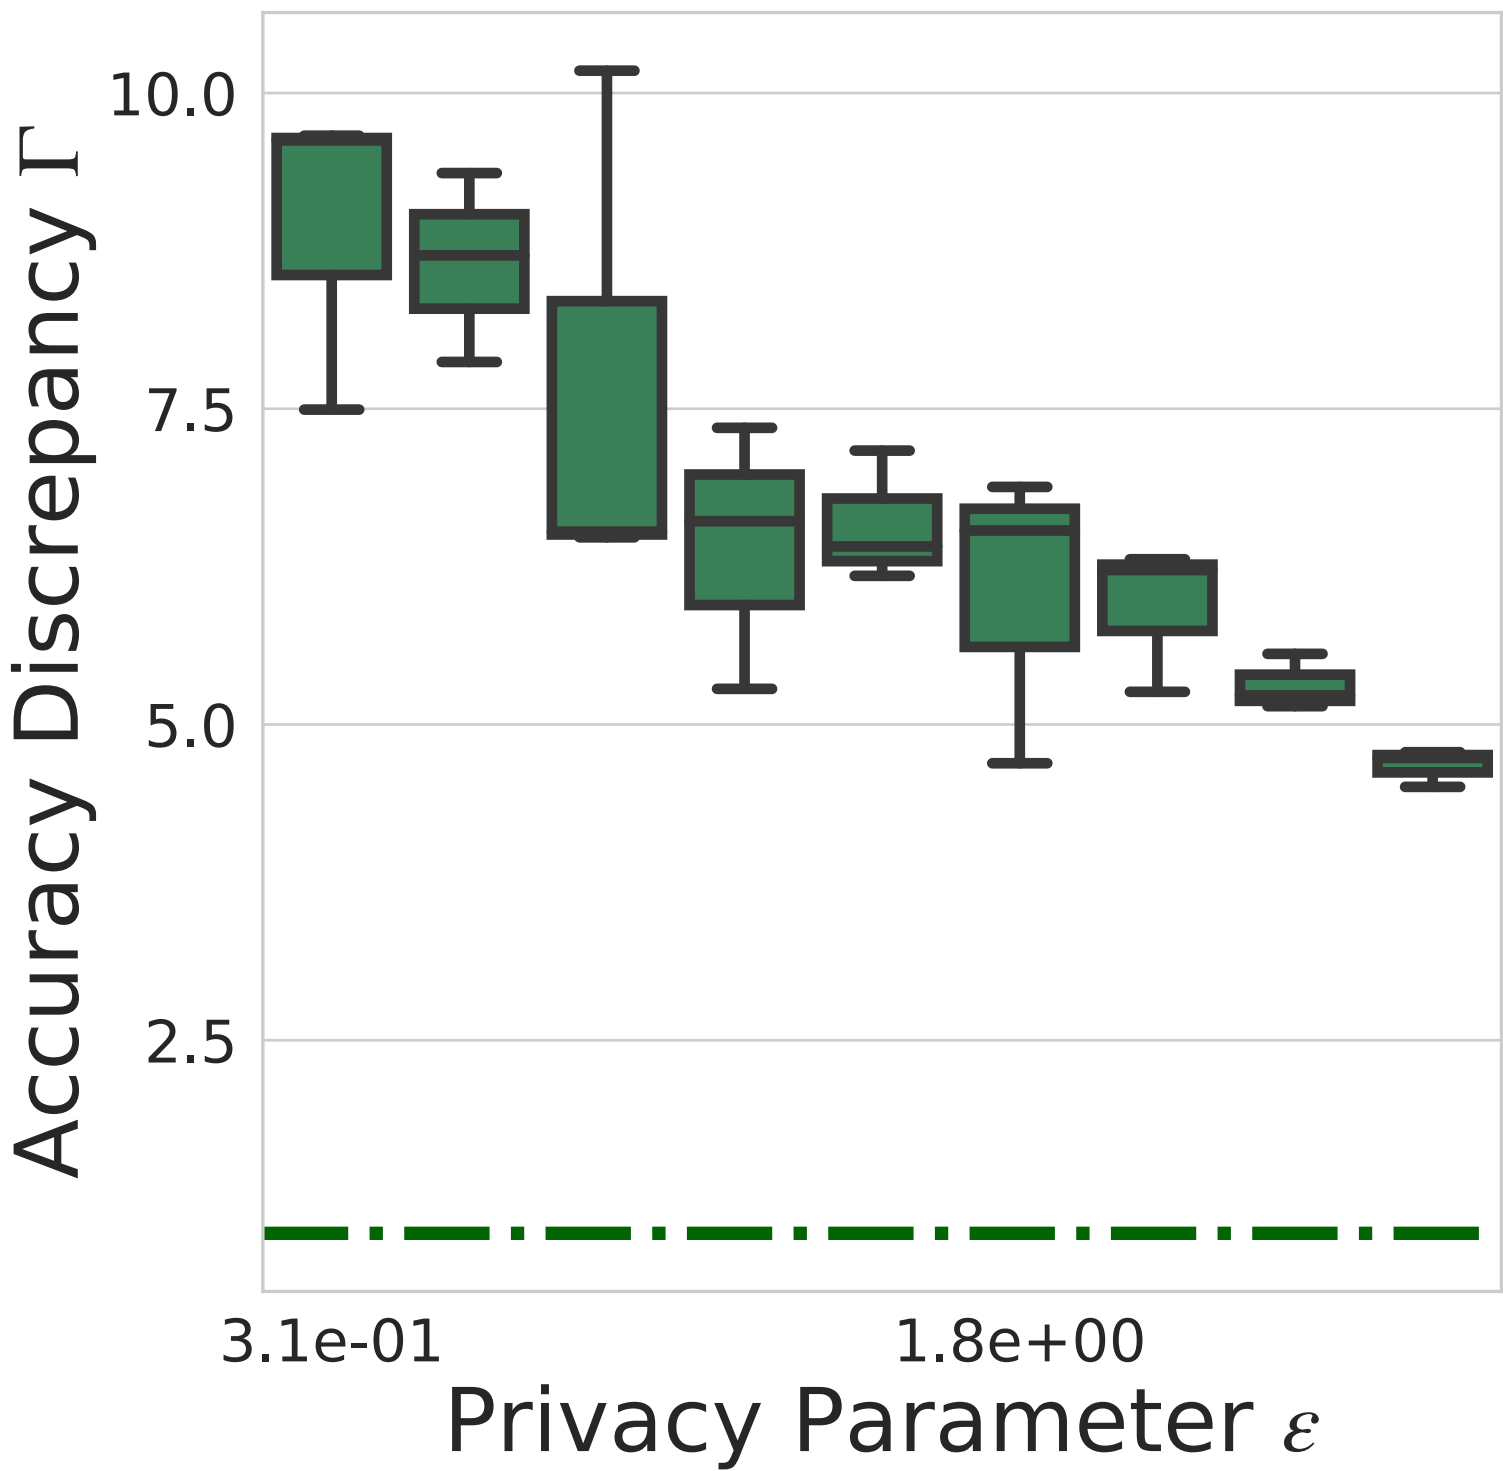

Supplement: supplementary_material [file attachment]

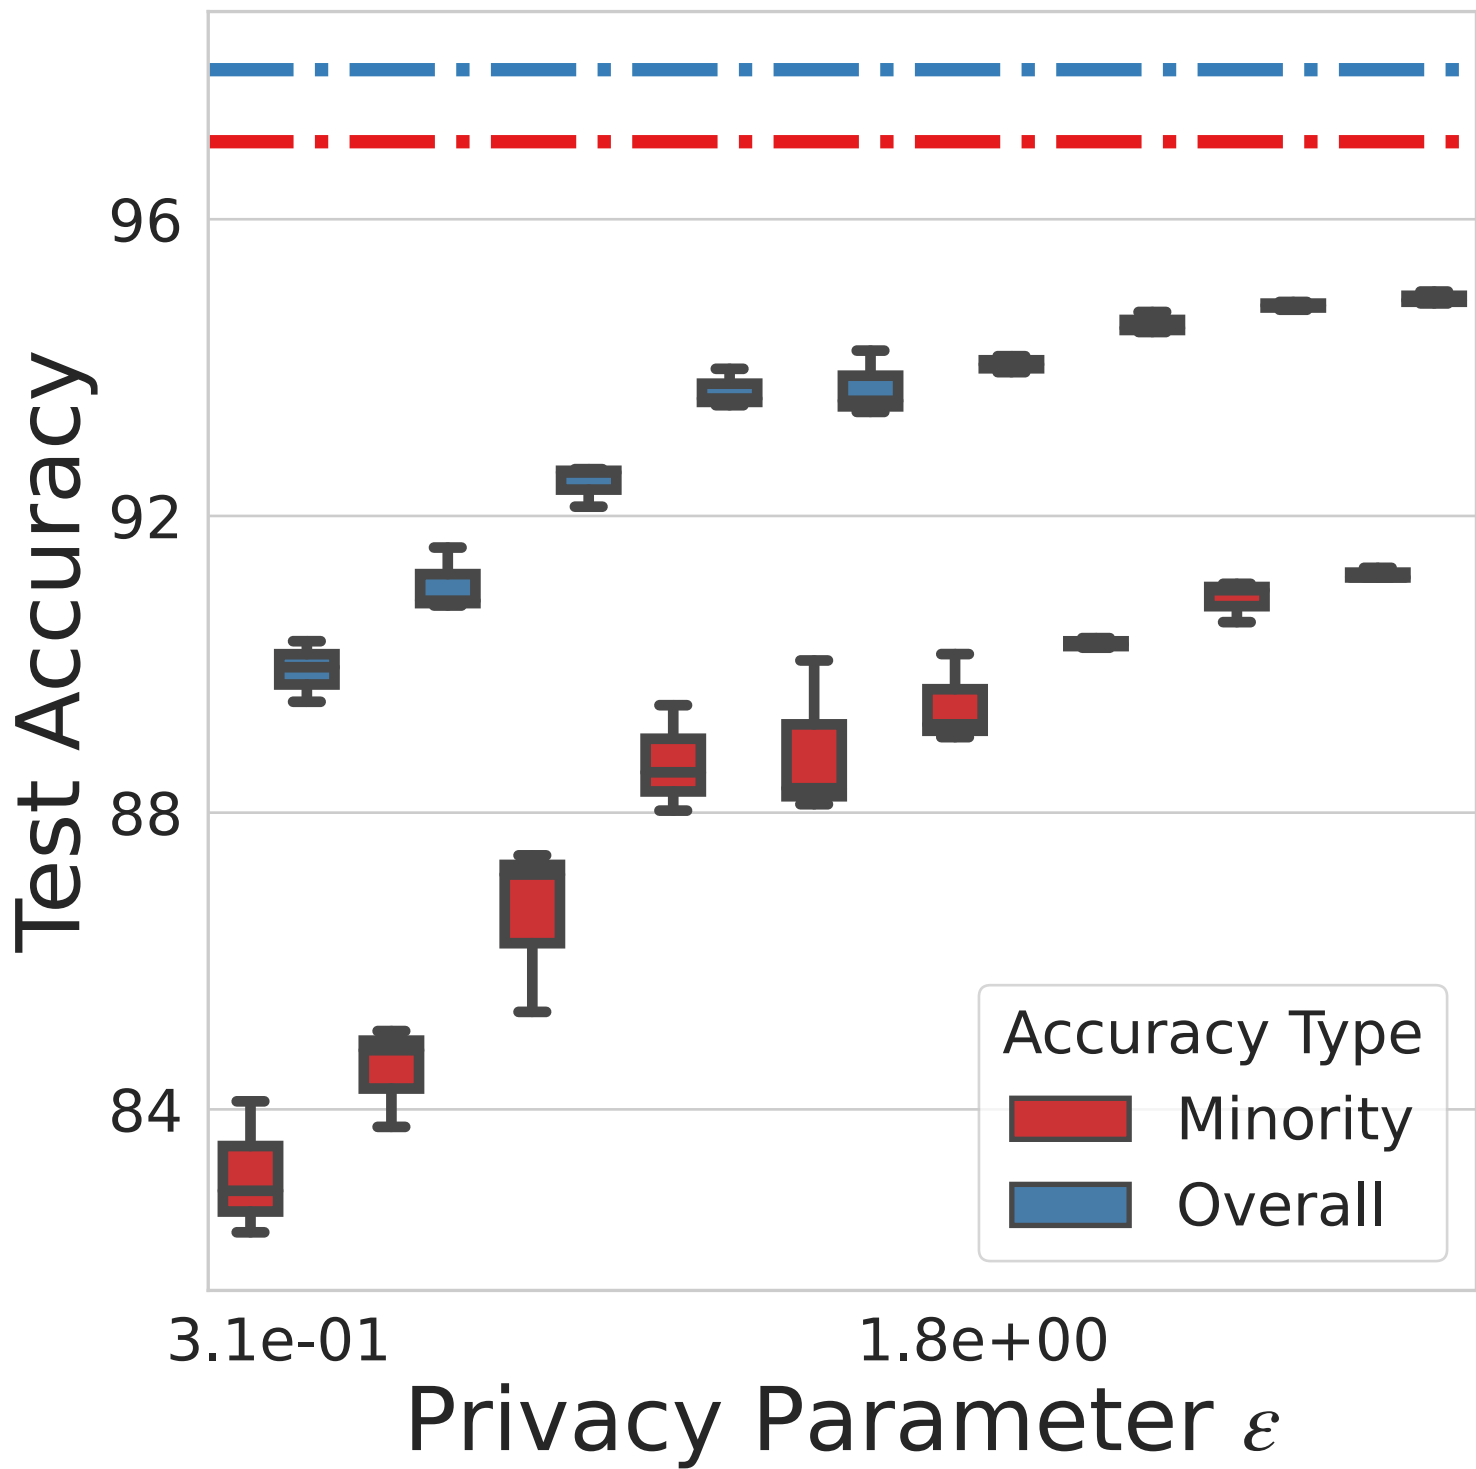

Supplement: supplementary_material [file attachment]

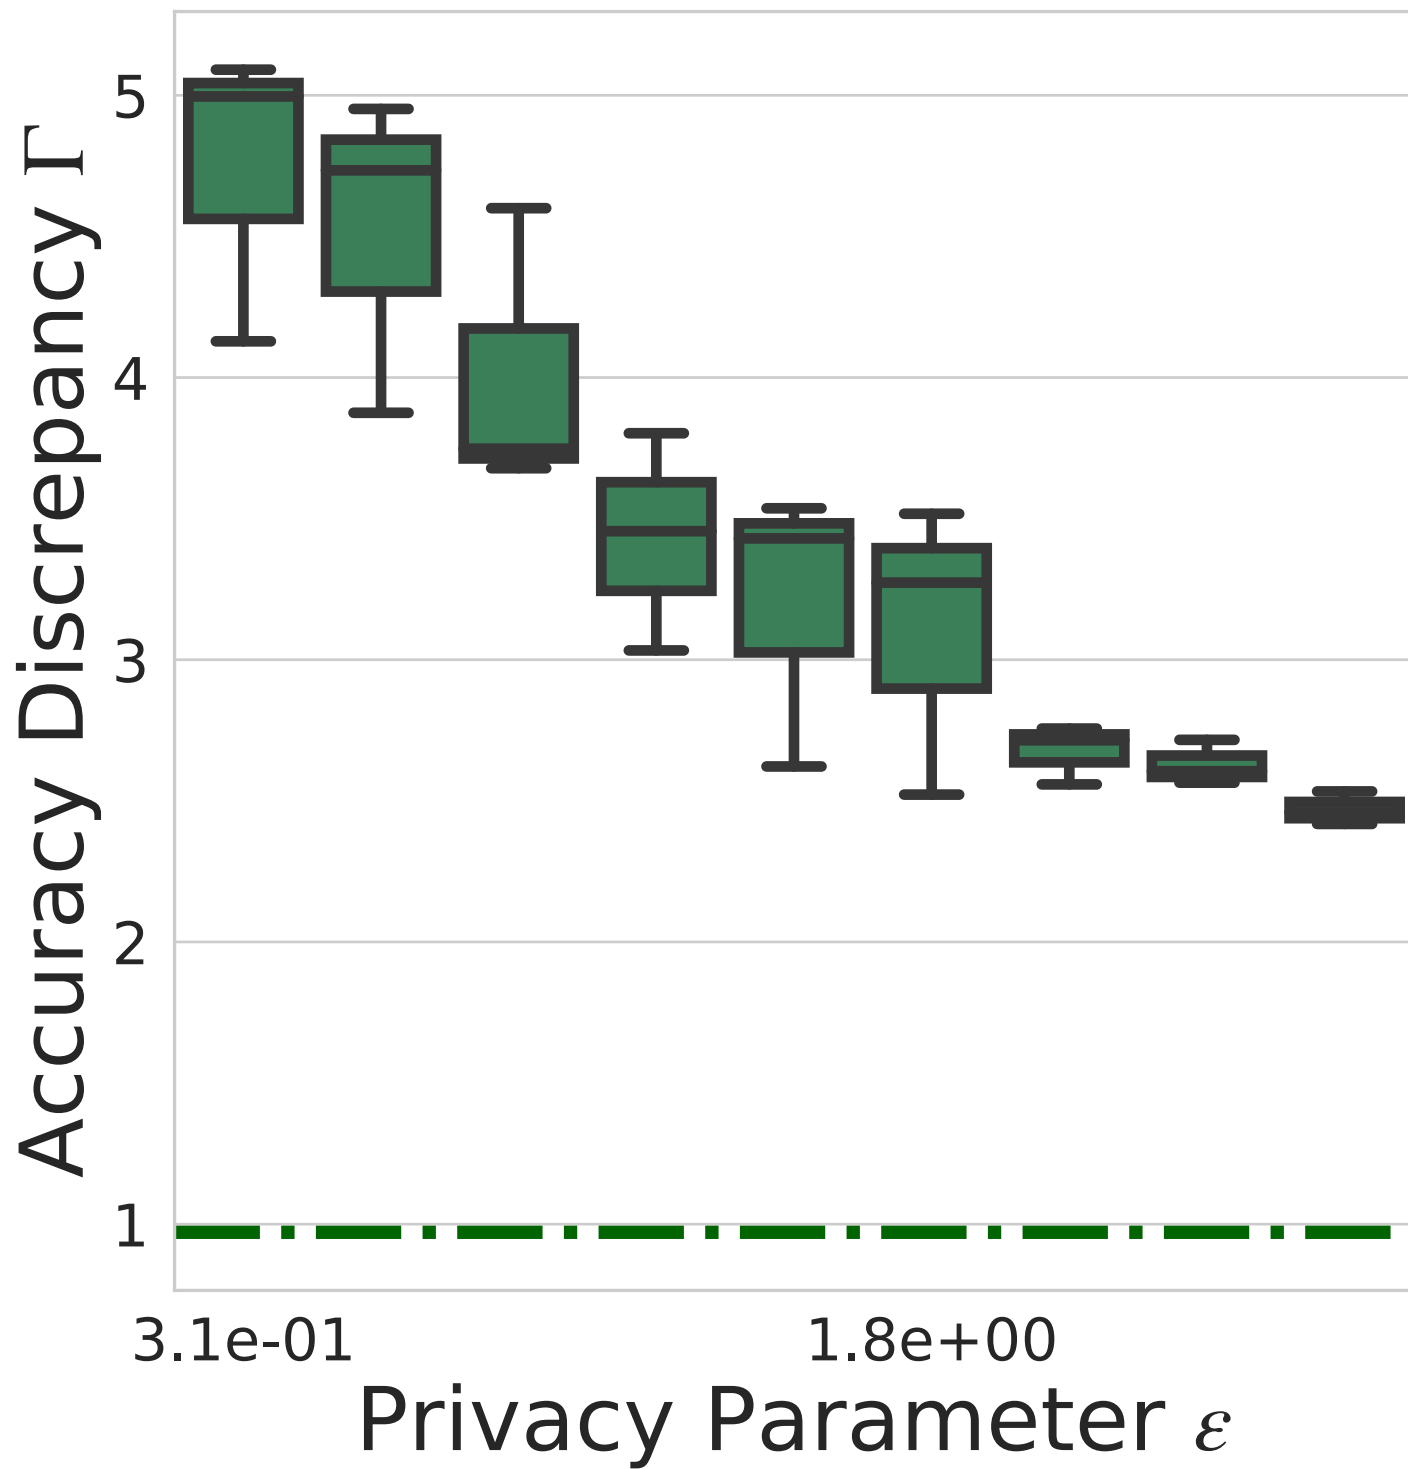

Supplement: supplementary_material [file attachment]

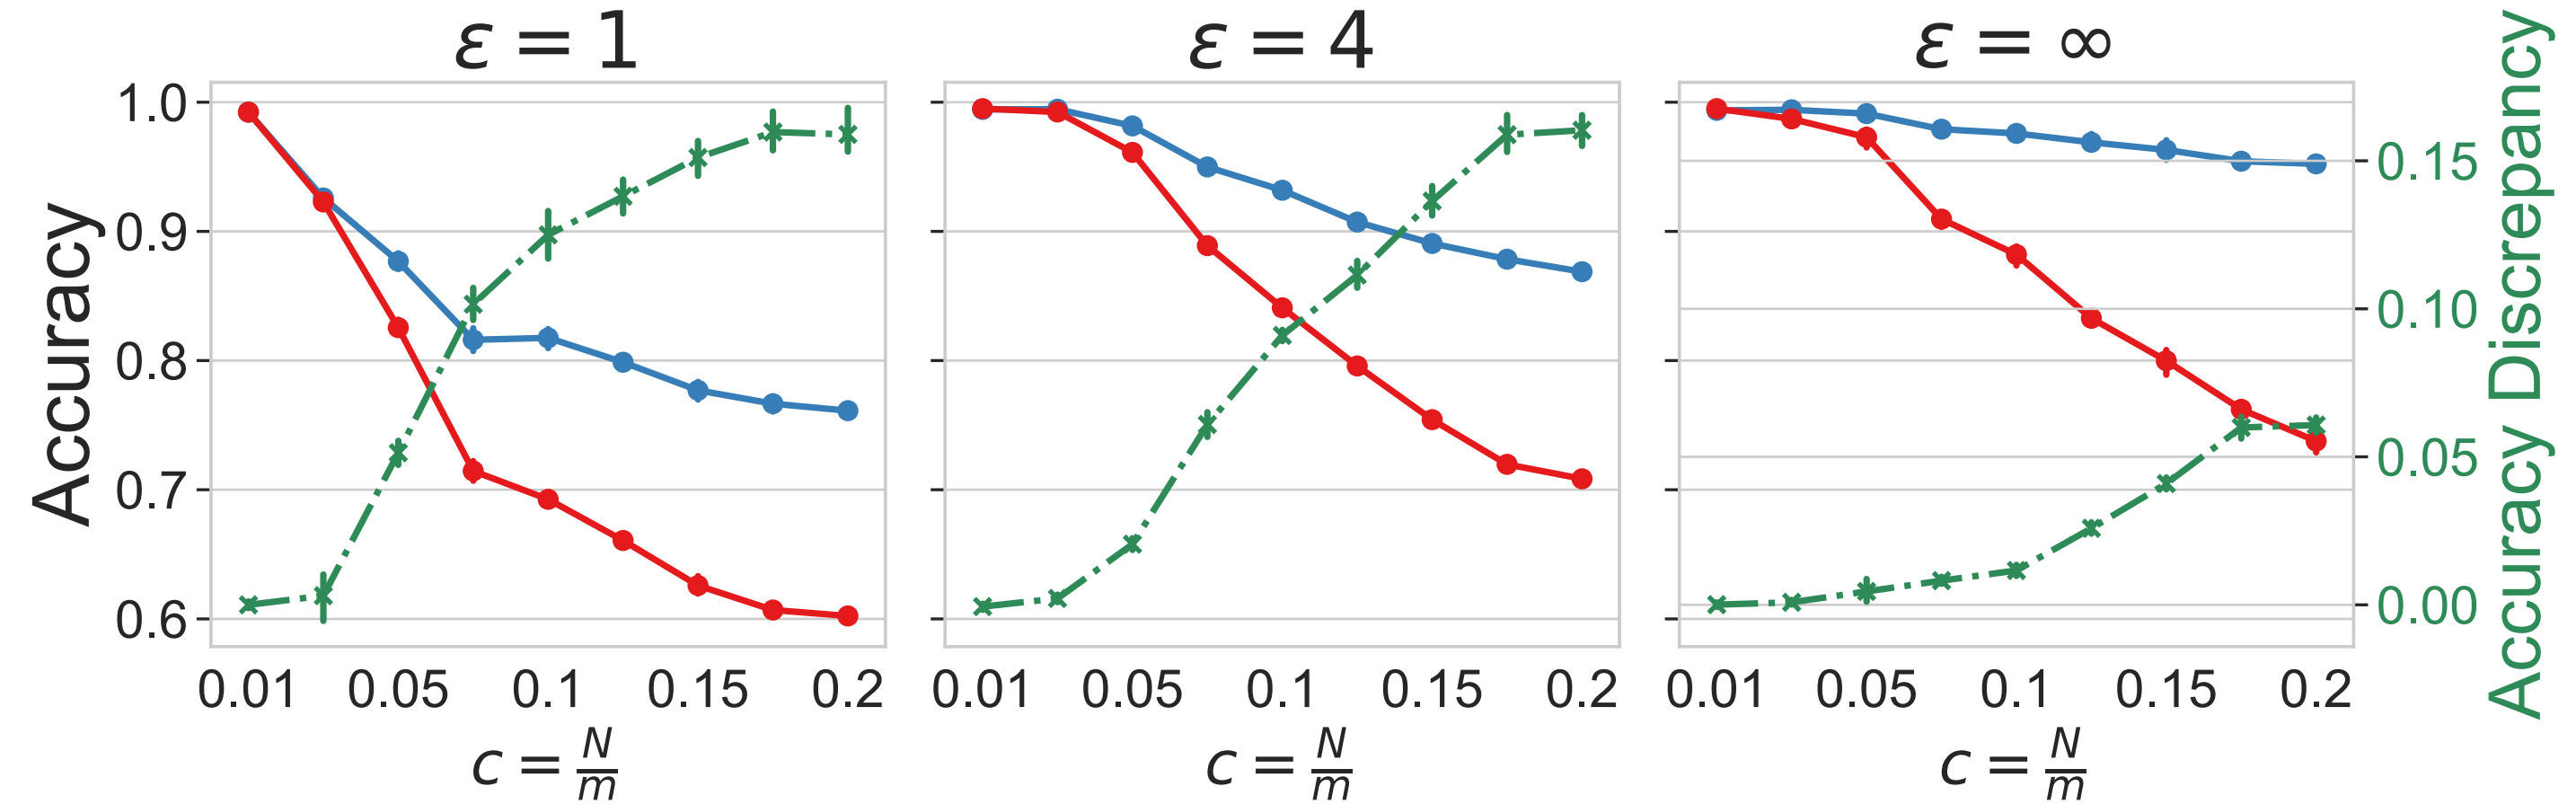

Supplement: supplementary_material [file attachment]

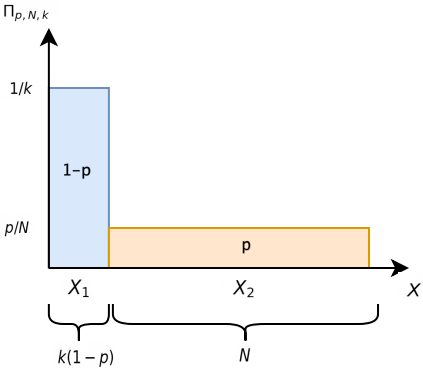

Supplement: supplementary_material [file attachment]

Accuracy Discrepancy  $\Gamma$

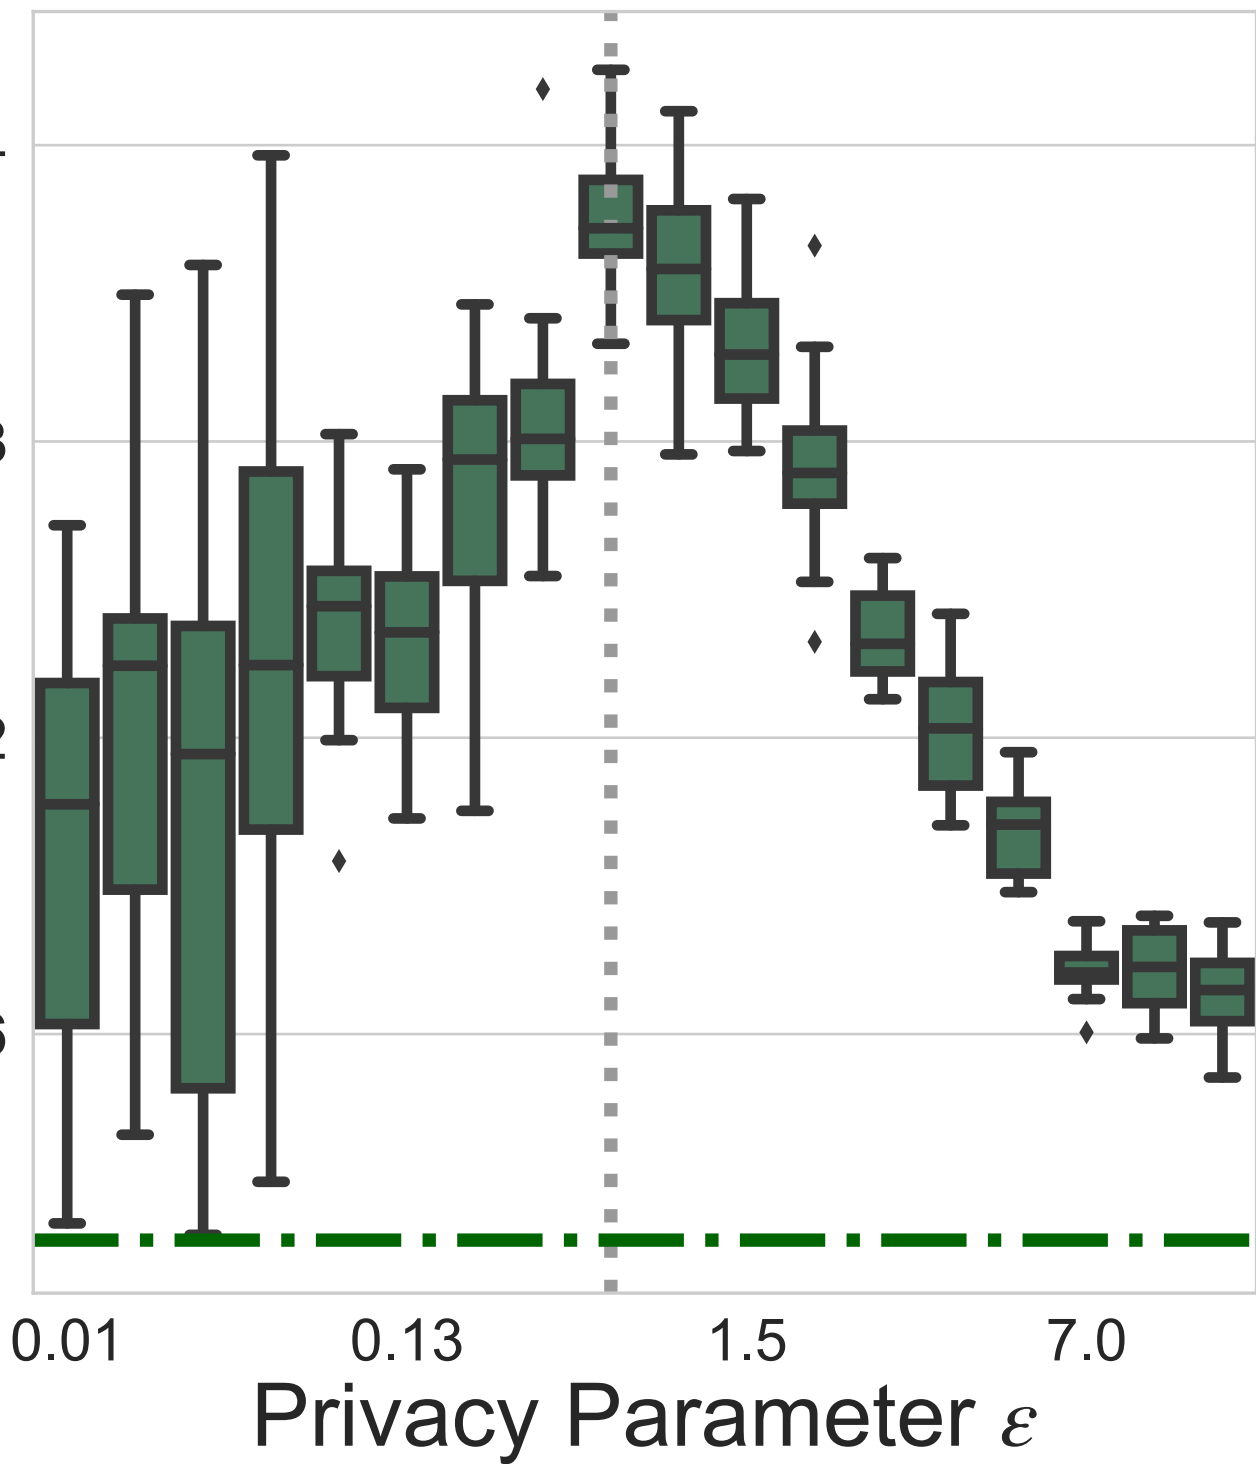

Supplement: supplementary_material [file attachment]

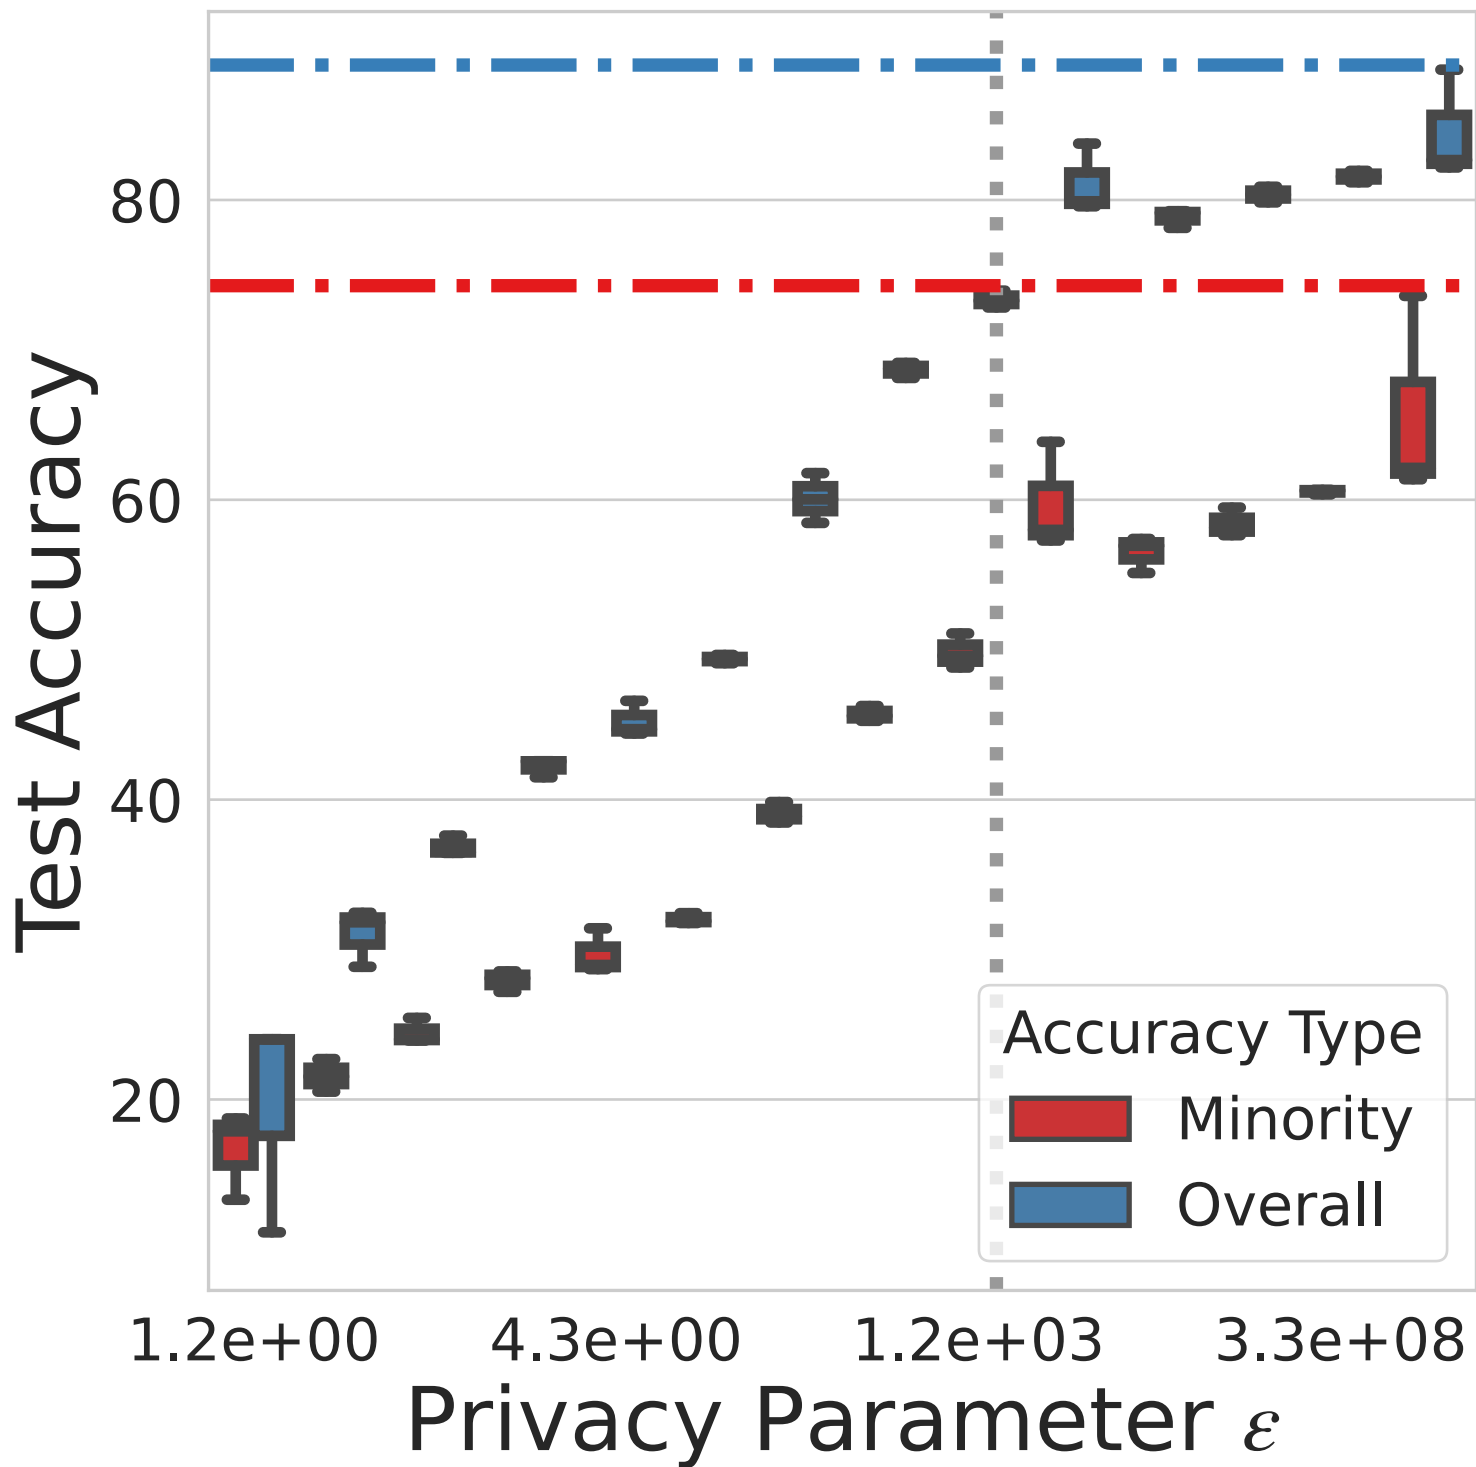

Supplement: supplementary_material [file attachment]

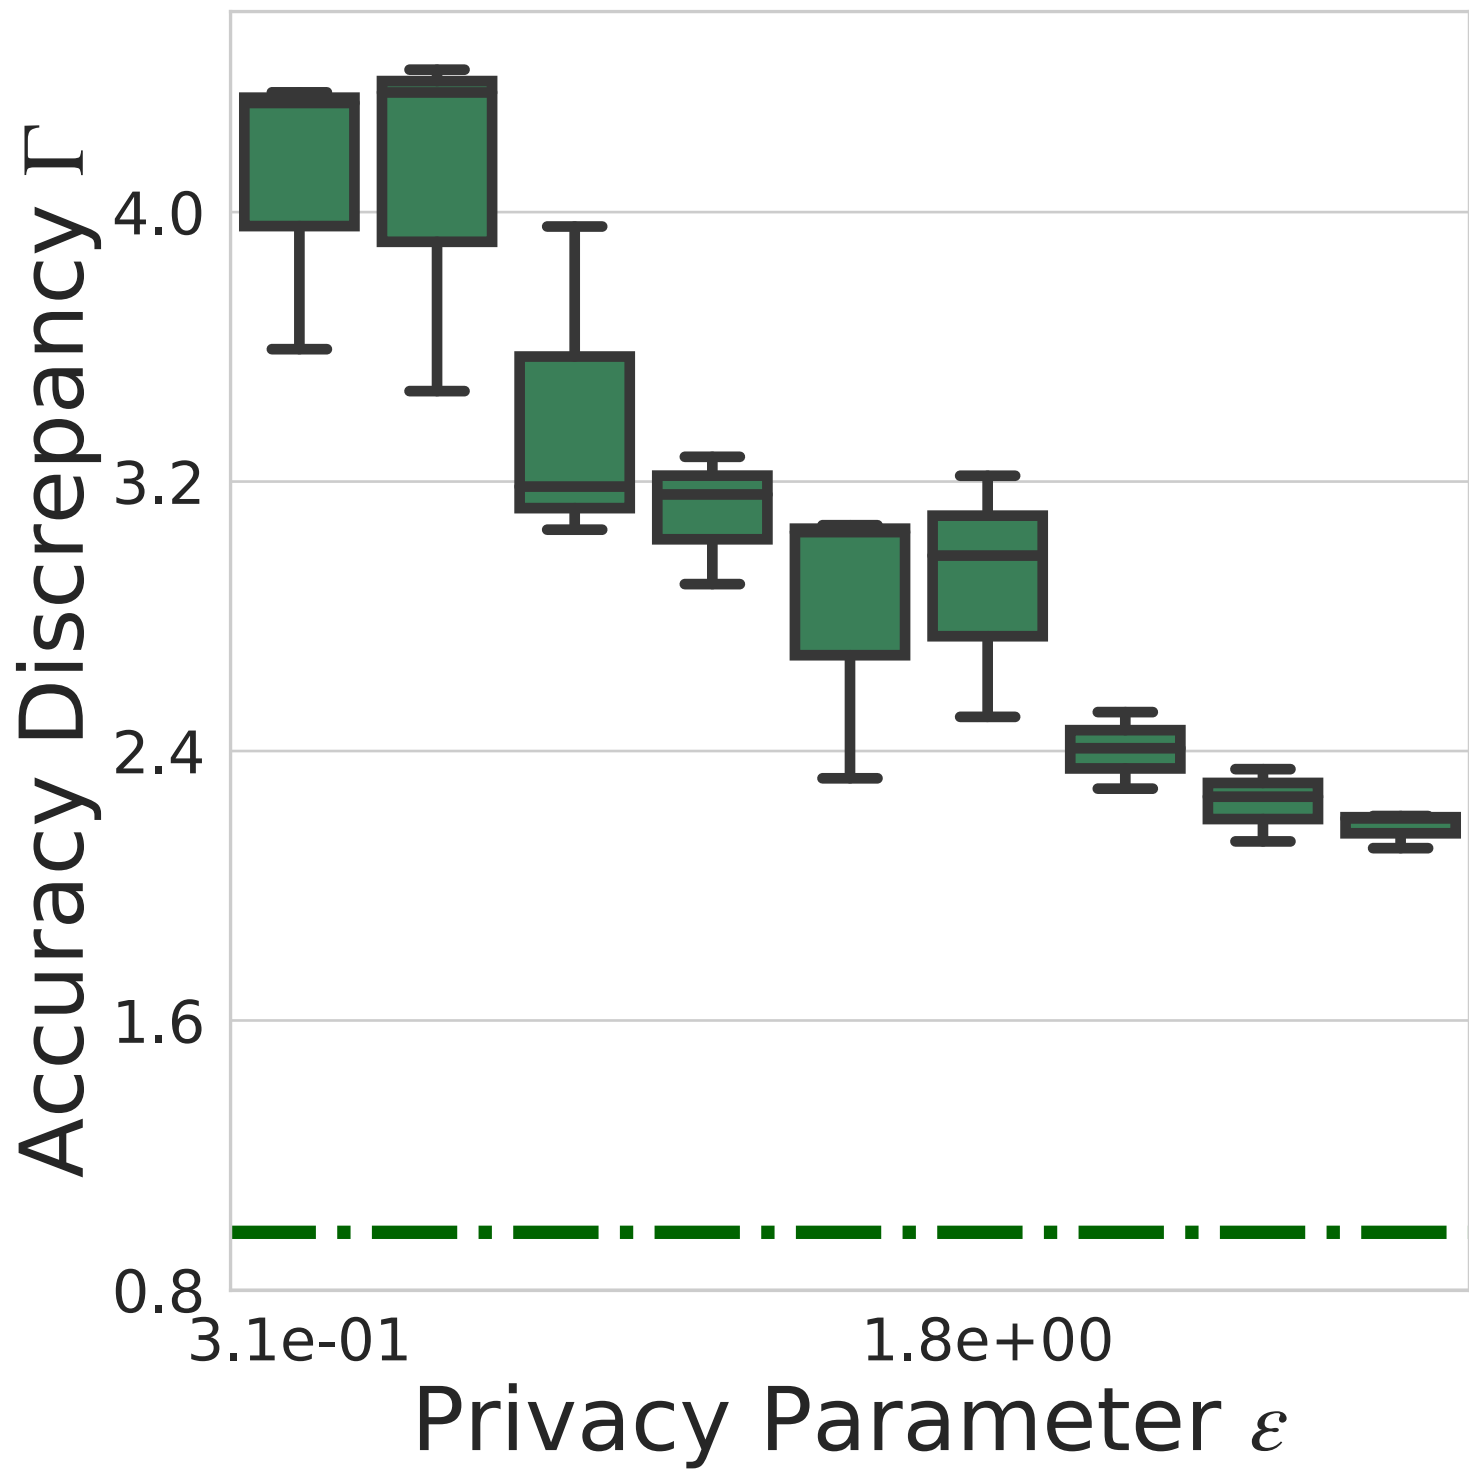

Supplement: supplementary_material [file attachment]

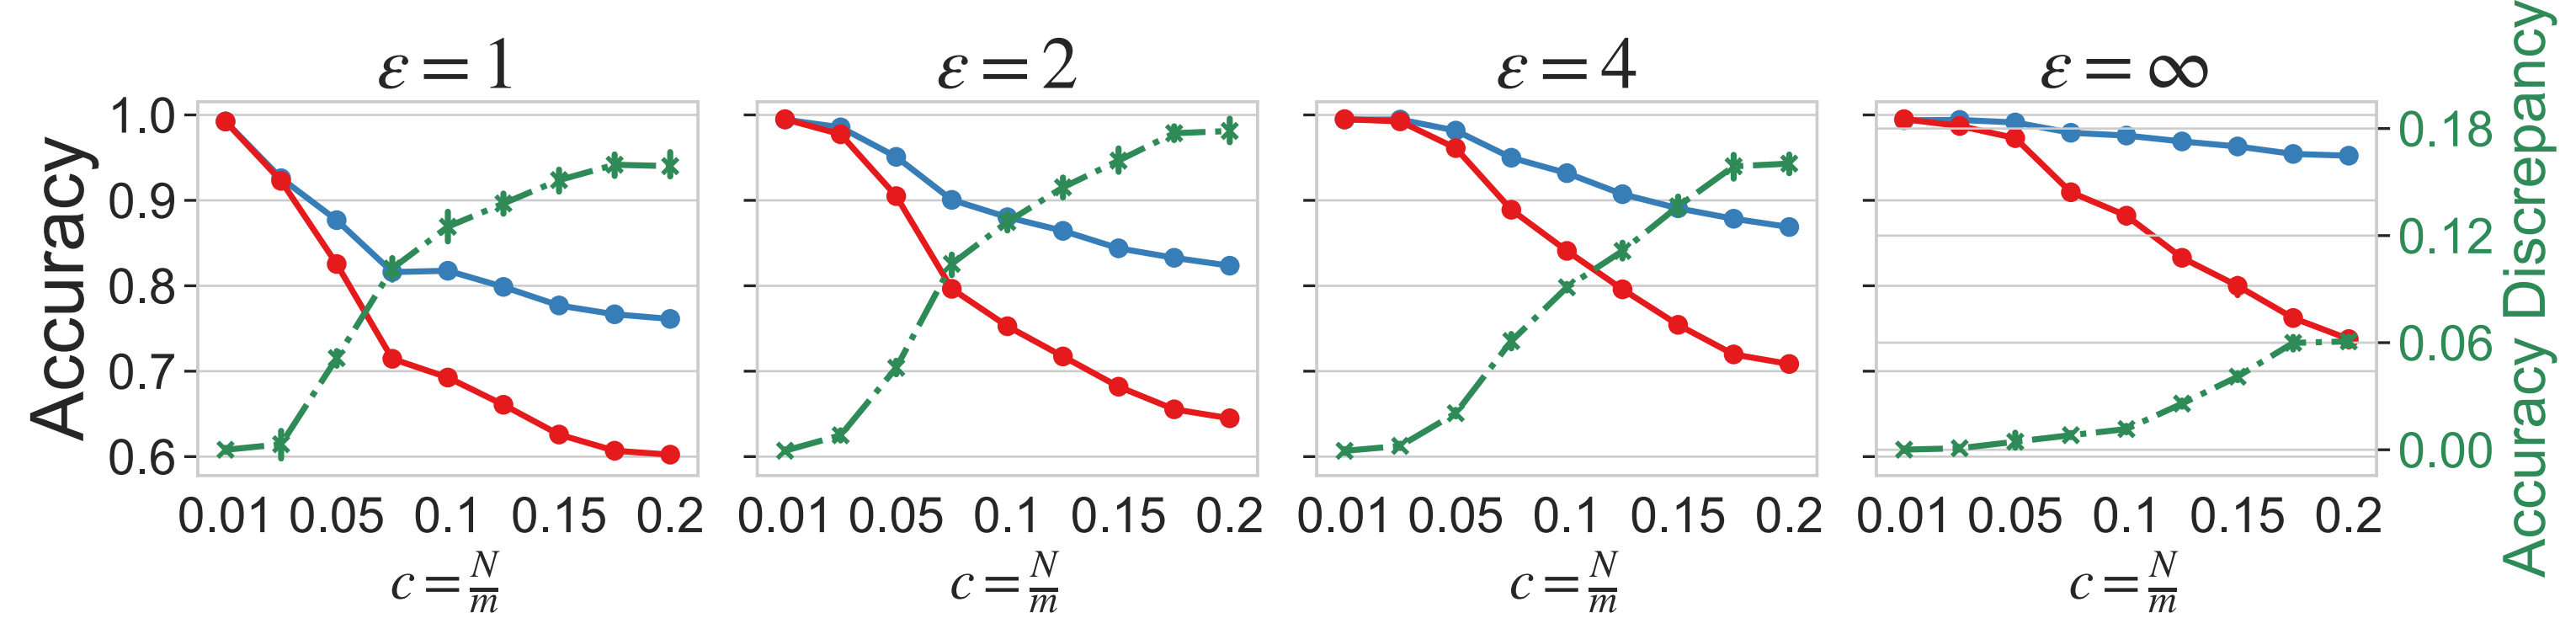

Supplement: supplementary_material [file attachment]

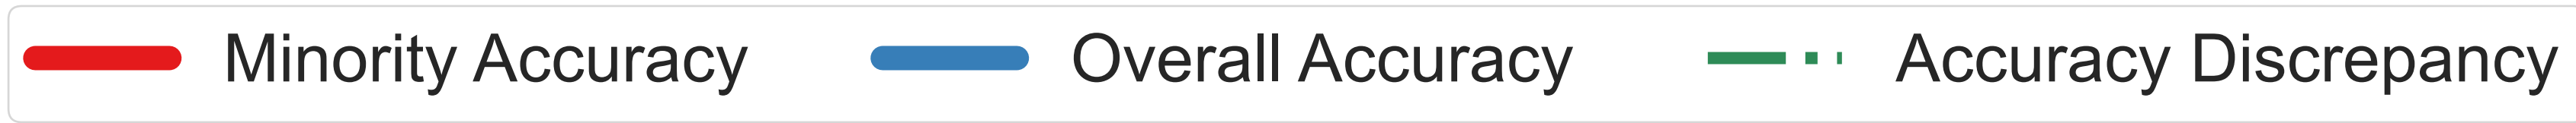

Supplement: supplementary_material [file attachment]

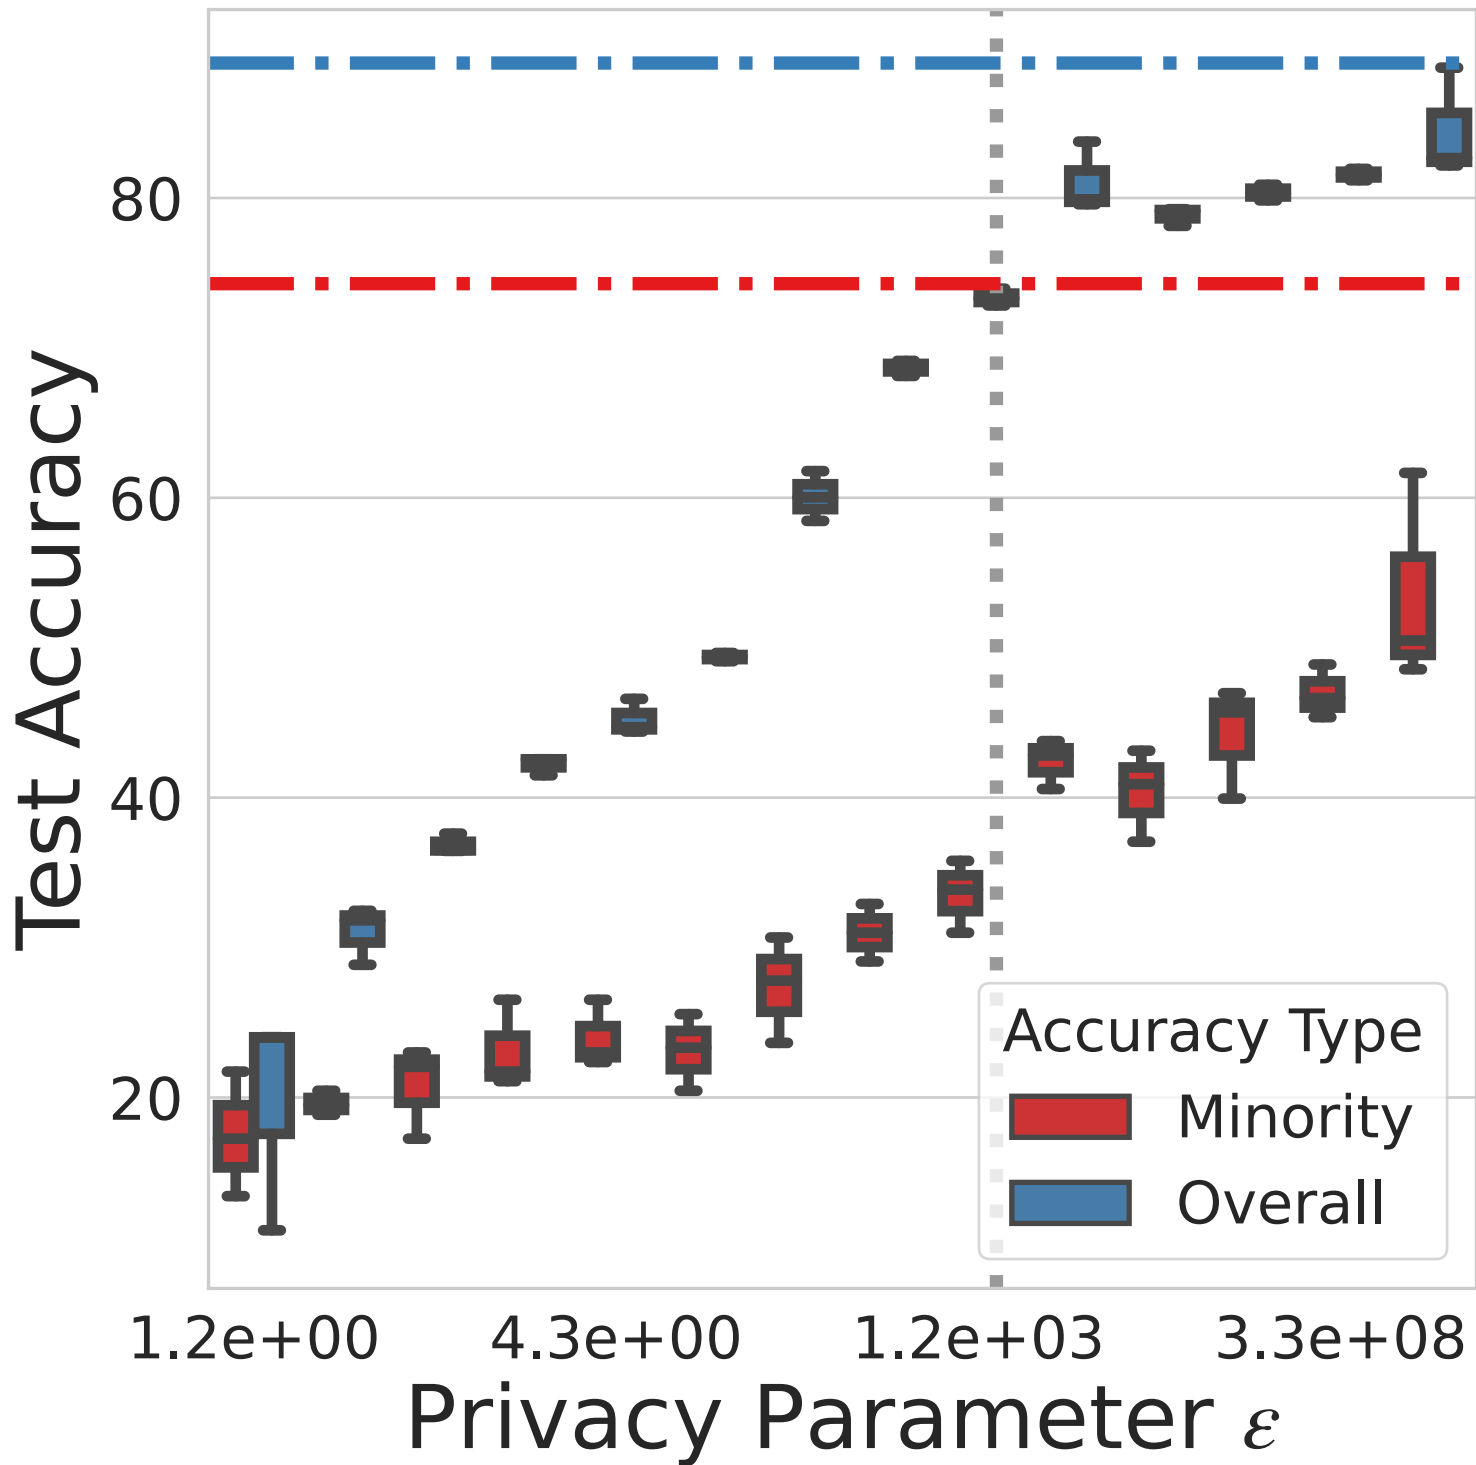

Supplement: supplementary_material [file attachment]

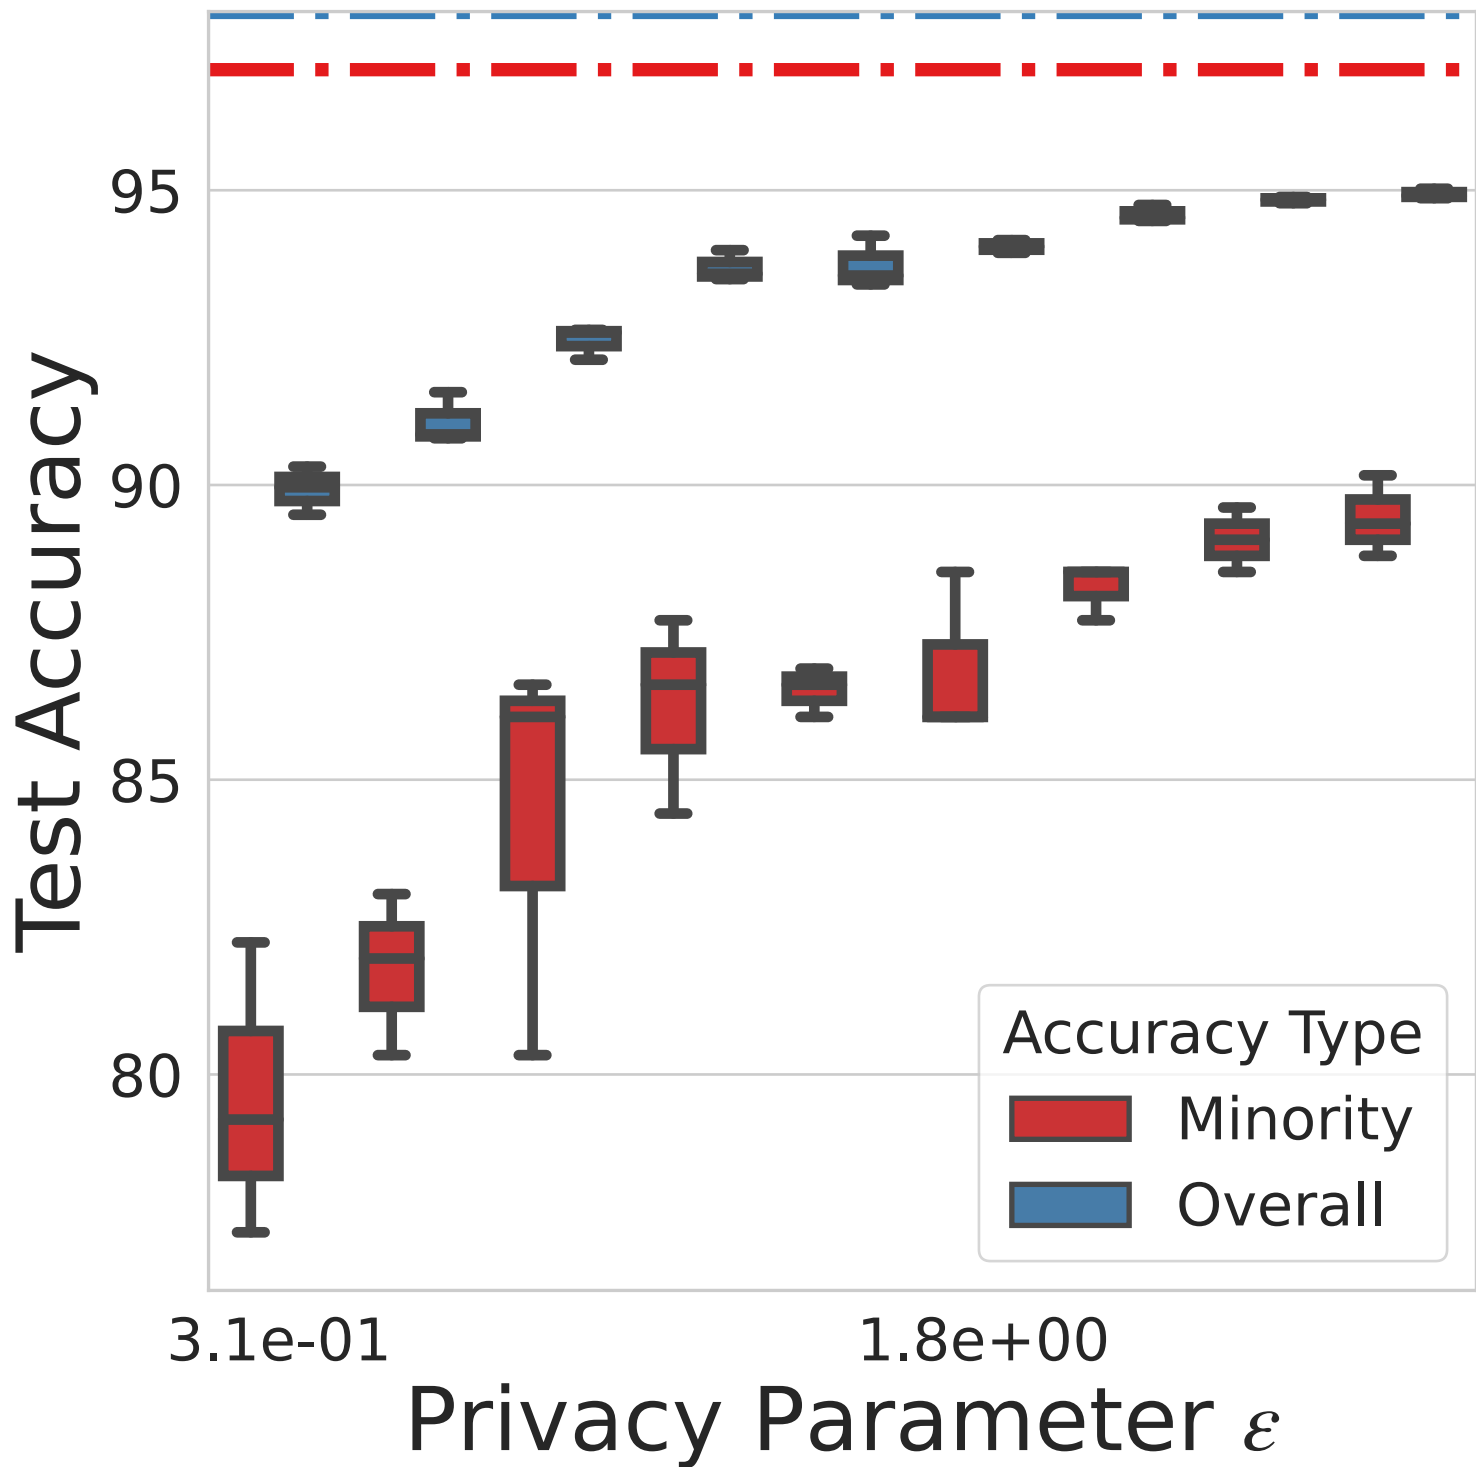

Supplement: supplementary_material [file attachment]

Probability mass

$8/m$

$4/m$

$2/m$

$1/m$

Majority subpopulations

Minority subpopulations

0

30000

60000

90000

Subpopulation ID

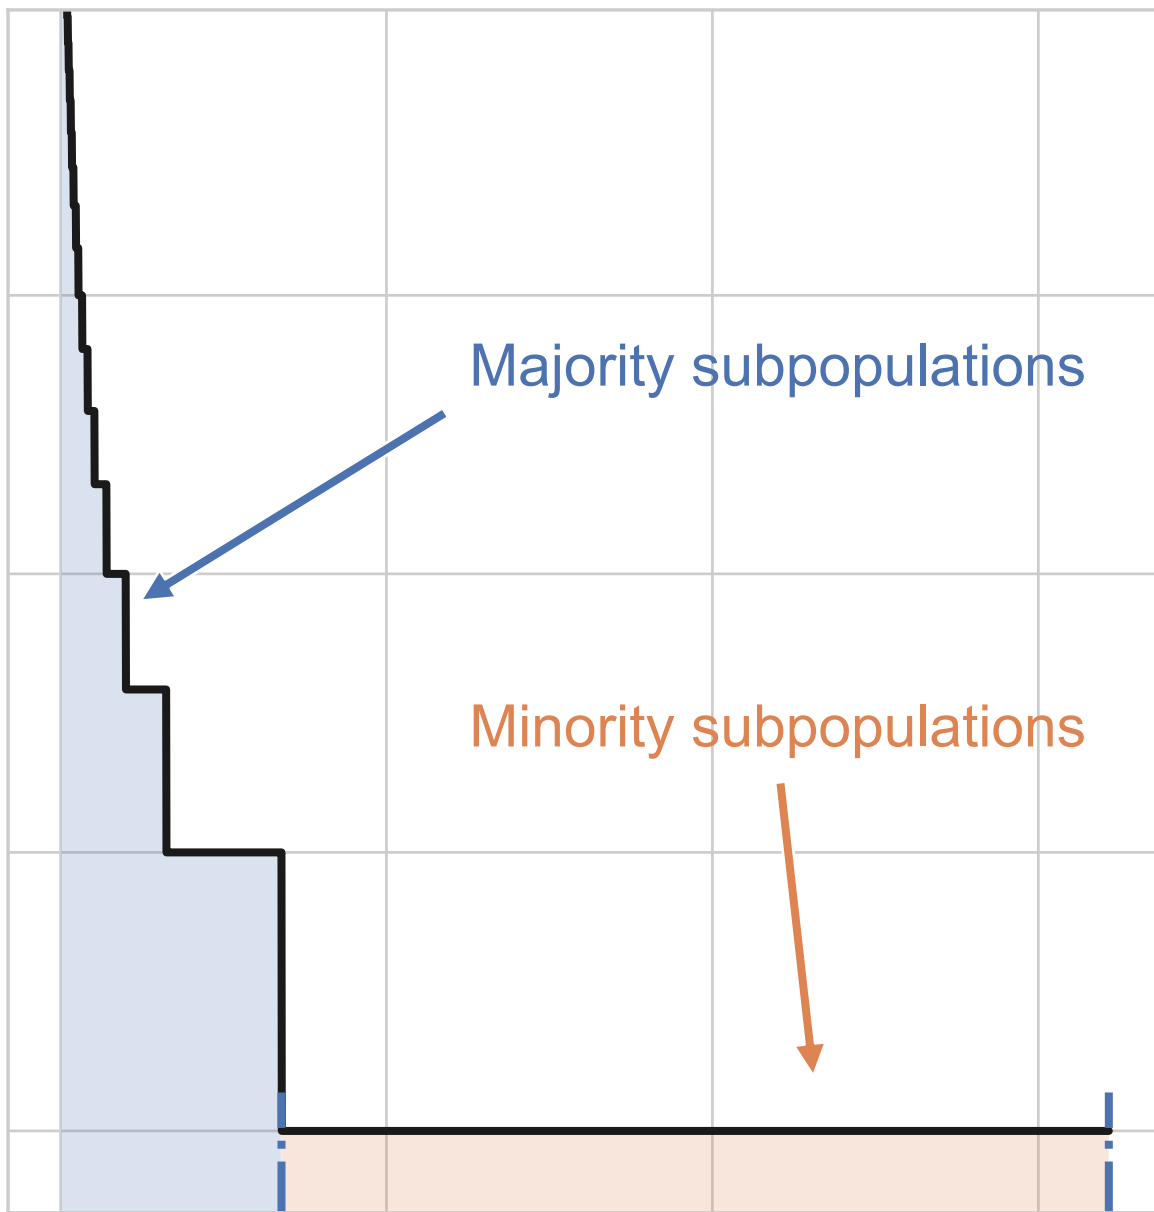

Supplement: supplementary_material [file attachment]

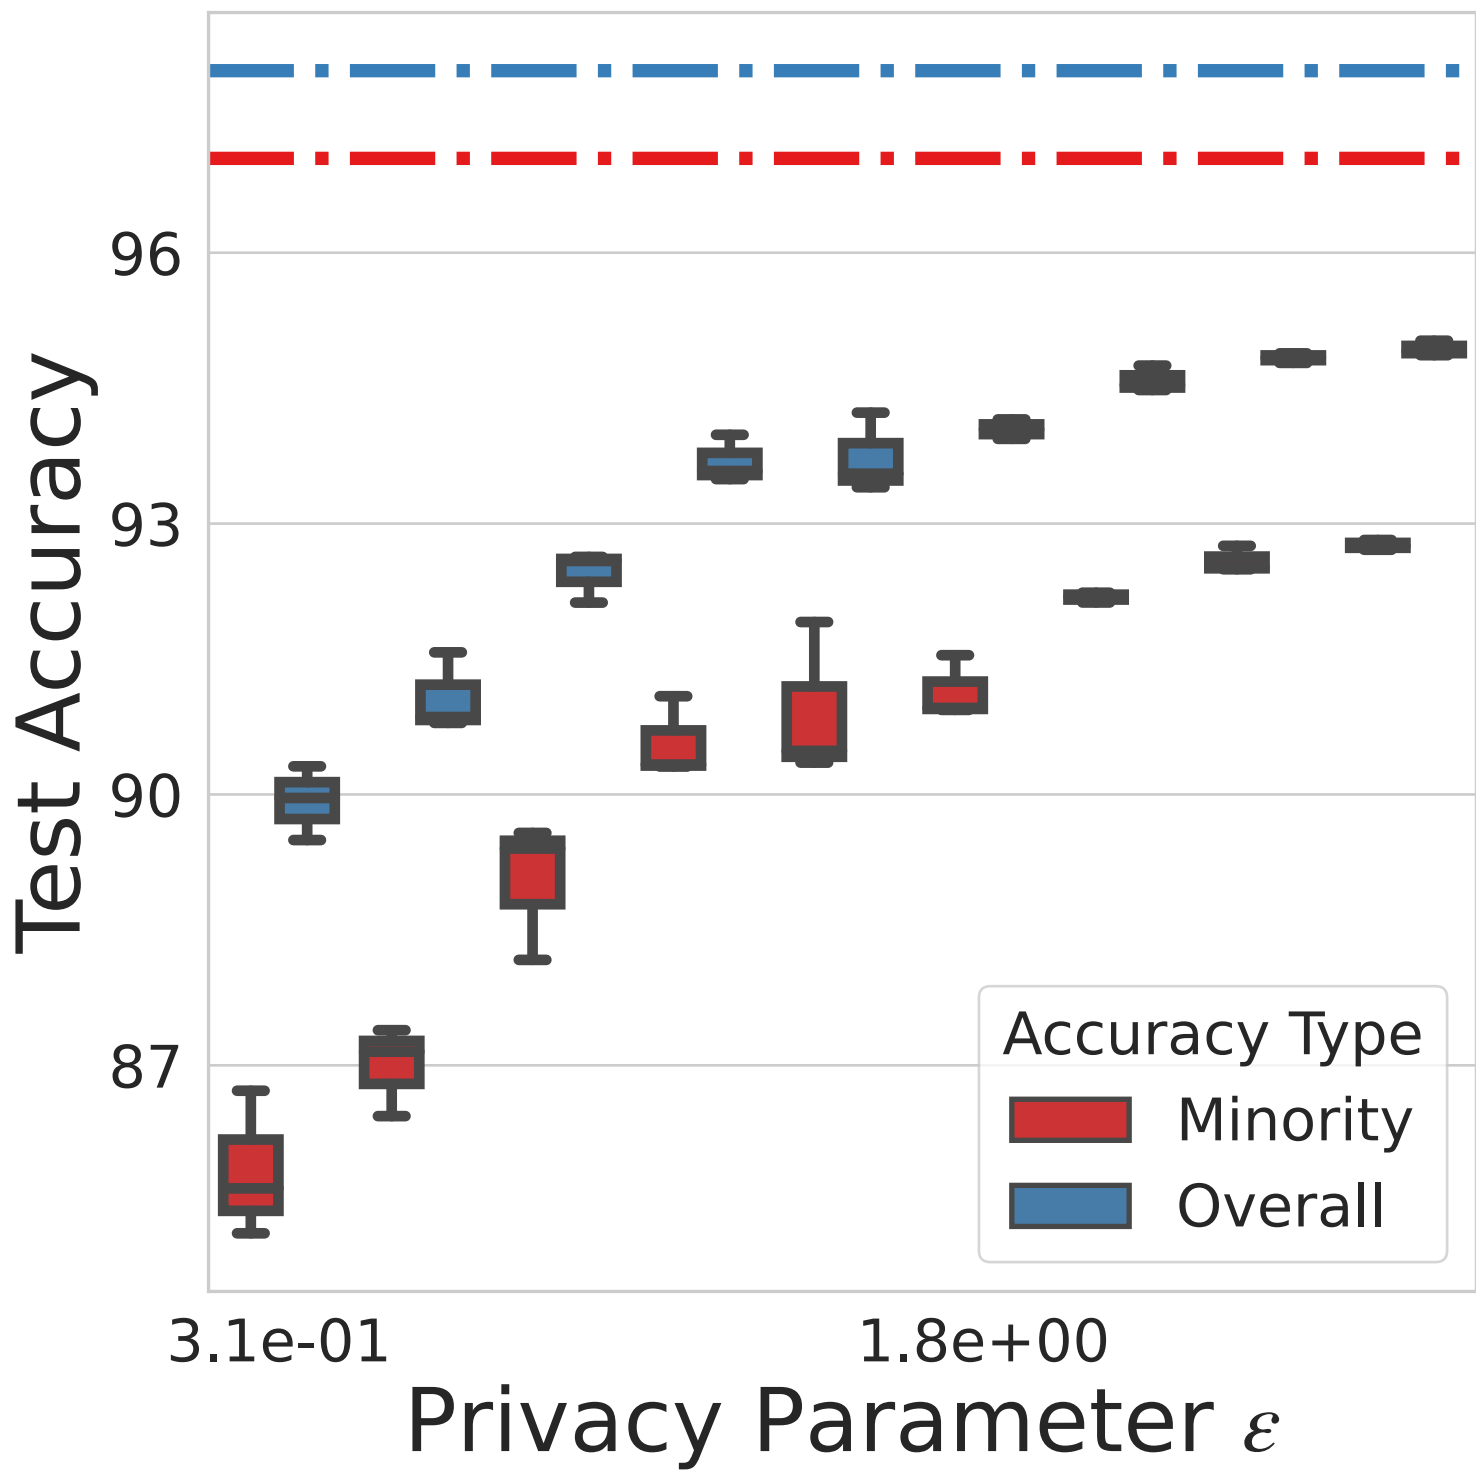

Supplement: supplementary_material [file attachment]
